# Supplementary material for: The Placental Response to Guinea Pig Cytomegalovirus Depends Upon the Timing of Maternal Infection
Source: Front Immunol. 2021 Jun 15;12:686415. doi: 10.3389/fimmu.2021.686415 (PMC8239309; doi:10.3389/fimmu.2021.686415)
Supplement: Supplementary file 8 [file Table_3.xlsx]

## Sheet: gProfiler_cporcellus_4-26-2021_
Table S3. Guinea pig immune process transcripts.
Name	Description	21_Mockv35_Mock	35_Mockv35_GPCMV	Notes
ENSCPOG00000039417	nan	X	X	LOC101788094 (C-C motif chemokine 15-like)
GPR174	G protein-coupled receptor 174 [Source:NCBI gene;Acc:100722265]	X	X
IDO1	indoleamine 2,3-dioxygenase 1 [Source:HGNC Symbol;Acc:HGNC:6059]	X	X
TLR8	toll like receptor 8 [Source:HGNC Symbol;Acc:HGNC:15632]	X	X
TRIL	TLR4 interactor with leucine rich repeats [Source:HGNC Symbol;Acc:HGNC:22200]	X	X
ADD2	adducin 2 [Source:HGNC Symbol;Acc:HGNC:244]		X
ADORA2B	adenosine A2b receptor [Source:HGNC Symbol;Acc:HGNC:264]		X
CFD	complement factor D [Source:HGNC Symbol;Acc:HGNC:2771]		X
CTSS	cathepsin S [Source:HGNC Symbol;Acc:HGNC:2545]		X
CXCL8	C-X-C motif chemokine ligand 8 [Source:HGNC Symbol;Acc:HGNC:6025]		X
EMILIN1	elastin microfibril interfacer 1 [Source:HGNC Symbol;Acc:HGNC:19880]		X
ENDOU	endonuclease, poly(U) specific [Source:HGNC Symbol;Acc:HGNC:14369]		X
ENSCPOG00000014463	nan		X	LOC100735392 (HLA class II histocompatibility antigen, DQ alpha 1 chain-like)
ENSCPOG00000032859	nan		X	LOC100714780 (HLA class II histocompatibility antigen, DP beta 1 chain-like)
ENSCPOG00000034829	nan		X	LOC101788791 (low affinity immunoglobulin gamma Fc region receptor IV)
ENSCPOG00000035477	nan		X	LOC100713671 (HLA class II histocompatibility antigen, DP alpha 1 chain-like)
ENSCPOG00000039065	nan		X	LOC100734697 (interleukin-36 beta-like)
KLF1	Kruppel like factor 1 [Source:HGNC Symbol;Acc:HGNC:6345]		X
LOXL3	lysyl oxidase like 3 [Source:HGNC Symbol;Acc:HGNC:13869]		X
NLRC5	NLR family CARD domain containing 5 [Source:HGNC Symbol;Acc:HGNC:29933]		X
OASL	2'-5'-oligoadenylate synthetase like [Source:HGNC Symbol;Acc:HGNC:8090]		X
PSMB8	proteasome 20S subunit beta 8 [Source:HGNC Symbol;Acc:HGNC:9545]		X
SLC4A1	solute carrier family 4 member 1 (Diego blood group) [Source:HGNC Symbol;Acc:HGNC:11027]		X
ADAM8	ADAM metallopeptidase domain 8 [Source:HGNC Symbol;Acc:HGNC:215]	X
ADCY7	adenylate cyclase 7 [Source:HGNC Symbol;Acc:HGNC:238]	X
ALAS2	5'-aminolevulinate synthase 2 [Source:HGNC Symbol;Acc:HGNC:397]	X
ALPK1	alpha kinase 1 [Source:HGNC Symbol;Acc:HGNC:20917]	X
ANLN	anillin actin binding protein [Source:HGNC Symbol;Acc:HGNC:14082]	X
ARG1	arginase 1 [Source:HGNC Symbol;Acc:HGNC:663]	X
ARL11	ADP ribosylation factor like GTPase 11 [Source:HGNC Symbol;Acc:HGNC:24046]	X
ATP11C	ATPase phospholipid transporting 11C [Source:HGNC Symbol;Acc:HGNC:13554]	X
BACH2	BTB domain and CNC homolog 2 [Source:NCBI gene;Acc:100717541]	X
BATF	basic leucine zipper ATF-like transcription factor [Source:HGNC Symbol;Acc:HGNC:958]	X
BMP6	bone morphogenetic protein 6 [Source:HGNC Symbol;Acc:HGNC:1073]	X
C2	complement C2 [Source:HGNC Symbol;Acc:HGNC:1248]	X
CASP1	caspase 1 [Source:HGNC Symbol;Acc:HGNC:1499]	X
CCNB2	cyclin B2 [Source:HGNC Symbol;Acc:HGNC:1580]	X
CD180	CD180 molecule [Source:HGNC Symbol;Acc:HGNC:6726]	X
CD19	CD19 molecule [Source:HGNC Symbol;Acc:HGNC:1633]	X
CD1D	CD1d molecule [Source:HGNC Symbol;Acc:HGNC:1637]	X
CD226	CD226 molecule [Source:HGNC Symbol;Acc:HGNC:16961]	X
CD3D	CD3d molecule [Source:HGNC Symbol;Acc:HGNC:1673]	X
CD3E	CD3e molecule [Source:HGNC Symbol;Acc:HGNC:1674]	X
CD6	CD6 molecule [Source:HGNC Symbol;Acc:HGNC:1691]	X
CDH17	cadherin 17 [Source:NCBI gene;Acc:100718080]	X
CLEC4G	C-type lectin domain family 4 member G [Source:HGNC Symbol;Acc:HGNC:24591]	X
CLU	clusterin [Source:HGNC Symbol;Acc:HGNC:2095]	X
CSF1R	colony stimulating factor 1 receptor [Source:HGNC Symbol;Acc:HGNC:2433]	X
CSF3R	colony stimulating factor 3 receptor [Source:HGNC Symbol;Acc:HGNC:2439]	X
CXCL10	C-X-C motif chemokine ligand 10 [Source:HGNC Symbol;Acc:HGNC:10637]	X
DPP4	dipeptidyl peptidase 4 [Source:HGNC Symbol;Acc:HGNC:3009]	X
ECM1	extracellular matrix protein 1 [Source:HGNC Symbol;Acc:HGNC:3153]	X
EGR1	early growth response 1 [Source:HGNC Symbol;Acc:HGNC:3238]	X
ENPP2	ectonucleotide pyrophosphatase/phosphodiesterase 2 [Source:HGNC Symbol;Acc:HGNC:3357]	X
ENSCPOG00000000481	nan	X		Large (like-glycosyltransferase)
ENSCPOG00000004675	nan	X		LOC100725052 (TRPM8 channel-associated factor 2)
ENSCPOG00000005525	nan	X		Siglec10 (sialic acid binding Ig like lectin 10)
ENSCPOG00000006122	nan	X		Trim59 (tripartite motif containing 59)
ENSCPOG00000007131	nan	X		Ccl25 (C-C motif chemokine ligand 25)
ENSCPOG00000008852	C-C motif chemokine 5 [Source:UniProtKB/Swiss-Prot;Acc:P97272]	X		Ccl5 (C-C motif chemokine ligand 5)
ENSCPOG00000008956	nan	X		Ggt1 (gamma-glutamyltransferase 1)
ENSCPOG00000011140	nan	X		Ccr2 (C-C motif chemokine receptor 2)
ENSCPOG00000012324	nan	X		Cd4 (CD4 molecule)
ENSCPOG00000015206	Growth-regulated alpha protein [Source:UniProtKB/Swiss-Prot;Acc:O55235]	X		Cxcl1 (chemokine (C-X-C motif) ligand 1)
ENSCPOG00000020029	transcription factor 7 [Source:HGNC Symbol;Acc:HGNC:11639]	X		Tcf7 (transcription factor 7)
ENSCPOG00000031535	nan	X		Osm (oncostatin M)
ENSCPOG00000038951	nan	X		Tap2 (transporter 2, ATP binding cassette subfamily B member)
ENSCPOG00000039744	nan	X		LOC100735260 (interleukin 36 gamma)
ENSCPOG00000040155	nan	X		LOC100735514 (protein S100-A8)
EPHB3	EPH receptor B3 [Source:HGNC Symbol;Acc:HGNC:3394]	X
EPHB6	EPH receptor B6 [Source:NCBI gene;Acc:100725865]	X
ESCO2	establishment of sister chromatid cohesion N-acetyltransferase 2 [Source:HGNC Symbol;Acc:HGNC:27230]	X
EXO1	exonuclease 1 [Source:HGNC Symbol;Acc:HGNC:3511]	X
F2	coagulation factor II, thrombin [Source:HGNC Symbol;Acc:HGNC:3535]	X
F7	coagulation factor VII [Source:HGNC Symbol;Acc:HGNC:3544]	X
FANCD2	FA complementation group D2 [Source:HGNC Symbol;Acc:HGNC:3585]	X
FAXDC2	fatty acid hydroxylase domain containing 2 [Source:HGNC Symbol;Acc:HGNC:1334]	X
FOS	Fos proto-oncogene, AP-1 transcription factor subunit [Source:HGNC Symbol;Acc:HGNC:3796]	X
FZD5	frizzled class receptor 5 [Source:HGNC Symbol;Acc:HGNC:4043]	X
G6PD	glucose-6-phosphate dehydrogenase [Source:HGNC Symbol;Acc:HGNC:4057]	X
GPC3	glypican 3 [Source:HGNC Symbol;Acc:HGNC:4451]	X
GPR18	G protein-coupled receptor 18 [Source:HGNC Symbol;Acc:HGNC:4472]	X
HMGB2	high mobility group box 2 [Source:HGNC Symbol;Acc:HGNC:5000]	X
HMGB3	high mobility group box 3 [Source:NCBI gene;Acc:100723306]	X
IGF1R	insulin like growth factor 1 receptor [Source:HGNC Symbol;Acc:HGNC:5465]	X
IL17F	interleukin 17F [Source:HGNC Symbol;Acc:HGNC:16404]	X
IL20RB	interleukin 20 receptor subunit beta [Source:HGNC Symbol;Acc:HGNC:6004]	X
IL7R	interleukin 7 receptor [Source:HGNC Symbol;Acc:HGNC:6024]	X
ITGA4	integrin subunit alpha 4 [Source:HGNC Symbol;Acc:HGNC:6140]	X
KLF4	Kruppel like factor 4 [Source:HGNC Symbol;Acc:HGNC:6348]	X
LCP1	lymphocyte cytosolic protein 1 [Source:HGNC Symbol;Acc:HGNC:6528]	X
LRRC17	leucine rich repeat containing 17 [Source:HGNC Symbol;Acc:HGNC:16895]	X
MITF	melanocyte inducing transcription factor [Source:HGNC Symbol;Acc:HGNC:7105]	X
MPO	myeloperoxidase [Source:HGNC Symbol;Acc:HGNC:7218]	X
MS4A1	membrane spanning 4-domains A1 [Source:HGNC Symbol;Acc:HGNC:7315]	X
MS4A2	membrane spanning 4-domains A2 [Source:NCBI gene;Acc:100715296]	X
MST1	macrophage stimulating 1 [Source:HGNC Symbol;Acc:HGNC:7380]	X
NCAPG2	non-SMC condensin II complex subunit G2 [Source:HGNC Symbol;Acc:HGNC:21904]	X
NLRP3	NLR family pyrin domain containing 3 [Source:HGNC Symbol;Acc:HGNC:16400]	X
NR1H3	nuclear receptor subfamily 1 group H member 3 [Source:HGNC Symbol;Acc:HGNC:7966]	X
P4HTM	prolyl 4-hydroxylase, transmembrane [Source:HGNC Symbol;Acc:HGNC:28858]	X
PLA2G10	phospholipase A2 group X [Source:HGNC Symbol;Acc:HGNC:9029]	X
PLA2G2F	phospholipase A2 group IIF [Source:HGNC Symbol;Acc:HGNC:30040]	X
PLA2G7	Platelet-activating factor acetylhydrolase [Source:UniProtKB/Swiss-Prot;Acc:P70683]	X
PRF1	perforin 1 [Source:HGNC Symbol;Acc:HGNC:9360]	X
PTPRD	protein tyrosine phosphatase receptor type D [Source:HGNC Symbol;Acc:HGNC:9668]	X
PTPRQ	protein tyrosine phosphatase receptor type Q [Source:HGNC Symbol;Acc:HGNC:9679]	X
RAG2	recombination activating 2 [Source:NCBI gene;Acc:100723894]	X
RET	ret proto-oncogene [Source:HGNC Symbol;Acc:HGNC:9967]	X
RTKN2	rhotekin 2 [Source:HGNC Symbol;Acc:HGNC:19364]	X
S100A9	S100 calcium binding protein A9 [Source:HGNC Symbol;Acc:HGNC:10499]	X
SAMHD1	SAM and HD domain containing deoxynucleoside triphosphate triphosphohydrolase 1 [Source:HGNC Symbol;Acc:HGNC:15925]	X
SCG2	secretogranin II [Source:HGNC Symbol;Acc:HGNC:10575]	X
SEMA4A	semaphorin 4A [Source:HGNC Symbol;Acc:HGNC:10729]	X
SEMA7A	semaphorin 7A (John Milton Hagen blood group) [Source:HGNC Symbol;Acc:HGNC:10741]	X
SFRP1	secreted frizzled related protein 1 [Source:HGNC Symbol;Acc:HGNC:10776]	X
SGPL1	sphingosine-1-phosphate lyase 1 [Source:HGNC Symbol;Acc:HGNC:10817]	X
SIX4	SIX homeobox 4 [Source:HGNC Symbol;Acc:HGNC:10890]	X
SLC7A1	solute carrier family 7 member 1 [Source:HGNC Symbol;Acc:HGNC:11057]	X
SLC8B1	solute carrier family 8 member B1 [Source:HGNC Symbol;Acc:HGNC:26175]	X
SMAD7	SMAD family member 7 [Source:HGNC Symbol;Acc:HGNC:6773]	X
TGFBR3	transforming growth factor beta receptor 3 [Source:HGNC Symbol;Acc:HGNC:11774]	X
TIFA	TRAF interacting protein with forkhead associated domain [Source:HGNC Symbol;Acc:HGNC:19075]	X
TMEM91	transmembrane protein 91 [Source:HGNC Symbol;Acc:HGNC:32393]	X
TNF	tumor necrosis factor [Source:HGNC Symbol;Acc:HGNC:11892]	X
TNFRSF11A	TNF receptor superfamily member 11a [Source:HGNC Symbol;Acc:HGNC:11908]	X
TNFRSF17	TNF receptor superfamily member 17 [Source:HGNC Symbol;Acc:HGNC:11913]	X
TNFSF13B	TNF superfamily member 13b [Source:HGNC Symbol;Acc:HGNC:11929]	X
TOP2A	DNA topoisomerase II alpha [Source:HGNC Symbol;Acc:HGNC:11989]	X
WNT4	Wnt family member 4 [Source:HGNC Symbol;Acc:HGNC:12783]	X
WNT5A	Wnt family member 5A [Source:HGNC Symbol;Acc:HGNC:12784]	X
ZBP1	Z-DNA binding protein 1 [Source:HGNC Symbol;Acc:HGNC:16176]	X
ZFPM1	zinc finger protein, FOG family member 1 [Source:HGNC Symbol;Acc:HGNC:19762]	X
ZNF385A	zinc finger protein 385A [Source:HGNC Symbol;Acc:HGNC:17521]	X
A2M	alpha-macroglobulin [Source:NCBI gene;Acc:100192394]
ABCC9	ATP binding cassette subfamily C member 9 [Source:HGNC Symbol;Acc:HGNC:60]
ABI1	abl interactor 1 [Source:HGNC Symbol;Acc:HGNC:11320]
ABL1	ABL proto-oncogene 1, non-receptor tyrosine kinase [Source:HGNC Symbol;Acc:HGNC:76]
ACE	angiotensin I converting enzyme [Source:NCBI gene;Acc:100715217]
ACIN1	apoptotic chromatin condensation inducer 1 [Source:HGNC Symbol;Acc:HGNC:17066]
ACOD1	aconitate decarboxylase 1 [Source:HGNC Symbol;Acc:HGNC:33904]
ACP6	acid phosphatase 6, lysophosphatidic [Source:HGNC Symbol;Acc:HGNC:29609]
ACTG1	actin gamma 1 [Source:HGNC Symbol;Acc:HGNC:144]
ACTN1	actinin alpha 1 [Source:HGNC Symbol;Acc:HGNC:163]
ACTR2	actin related protein 2 [Source:HGNC Symbol;Acc:HGNC:169]
ACTR3	actin related protein 3 [Source:HGNC Symbol;Acc:HGNC:170]
ACVR1B	activin A receptor type 1B [Source:HGNC Symbol;Acc:HGNC:172]
ACVR2A	activin A receptor type 2A [Source:HGNC Symbol;Acc:HGNC:173]
ADA	adenosine deaminase [Source:HGNC Symbol;Acc:HGNC:186]
ADAM10	ADAM metallopeptidase domain 10 [Source:HGNC Symbol;Acc:HGNC:188]
ADAM15	ADAM metallopeptidase domain 15 [Source:HGNC Symbol;Acc:HGNC:193]
ADAM17	ADAM metallopeptidase domain 17 [Source:HGNC Symbol;Acc:HGNC:195]
ADAR	adenosine deaminase RNA specific [Source:HGNC Symbol;Acc:HGNC:225]
ADD1	adducin 1 [Source:NCBI gene;Acc:100713878]
ADGRG3	adhesion G protein-coupled receptor G3 [Source:HGNC Symbol;Acc:HGNC:13728]
ADIPOQ	adiponectin, C1Q and collagen domain containing [Source:HGNC Symbol;Acc:HGNC:13633]
ADORA1	Adenosine receptor A1 [Source:UniProtKB/Swiss-Prot;Acc:P47745]
ADORA2A	adenosine A2a receptor [Source:HGNC Symbol;Acc:HGNC:263]
ADTRP	androgen dependent TFPI regulating protein [Source:HGNC Symbol;Acc:HGNC:21214]
AGBL4	ATP/GTP binding protein like 4 [Source:HGNC Symbol;Acc:HGNC:25892]
AGBL5	ATP/GTP binding protein like 5 [Source:HGNC Symbol;Acc:HGNC:26147]
AGER	advanced glycosylation end-product specific receptor [Source:HGNC Symbol;Acc:HGNC:320]
AGPAT5	1-acylglycerol-3-phosphate O-acyltransferase 5 [Source:HGNC Symbol;Acc:HGNC:20886]
AIMP1	aminoacyl tRNA synthetase complex interacting multifunctional protein 1 [Source:HGNC Symbol;Acc:HGNC:10648]
AIRE	autoimmune regulator [Source:HGNC Symbol;Acc:HGNC:360]
AKAP1	A-kinase anchoring protein 1 [Source:HGNC Symbol;Acc:HGNC:367]
AKIRIN1	akirin 1 [Source:HGNC Symbol;Acc:HGNC:25744]
AKT1	AKT serine/threonine kinase 1 [Source:HGNC Symbol;Acc:HGNC:391]
ALOX5	arachidonate 5-lipoxygenase [Source:HGNC Symbol;Acc:HGNC:435]
ANGPT1	angiopoietin 1 [Source:HGNC Symbol;Acc:HGNC:484]
ANKRD17	ankyrin repeat domain 17 [Source:HGNC Symbol;Acc:HGNC:23575]
ANKRD54	ankyrin repeat domain 54 [Source:HGNC Symbol;Acc:HGNC:25185]
ANO6	anoctamin 6 [Source:HGNC Symbol;Acc:HGNC:25240]
ANXA1	annexin A1 [Source:HGNC Symbol;Acc:HGNC:533]
ANXA3	annexin A3 [Source:HGNC Symbol;Acc:HGNC:541]
AP1G1	adaptor related protein complex 1 subunit gamma 1 [Source:HGNC Symbol;Acc:HGNC:555]
AP3B1	adaptor related protein complex 3 subunit beta 1 [Source:HGNC Symbol;Acc:HGNC:566]
AP3D1	adaptor related protein complex 3 subunit delta 1 [Source:HGNC Symbol;Acc:HGNC:568]
APBB1IP	amyloid beta precursor protein binding family B member 1 interacting protein [Source:HGNC Symbol;Acc:HGNC:17379]
APCS	Serum amyloid P-component [Source:UniProtKB/Swiss-Prot;Acc:P49255]
APLF	aprataxin and PNKP like factor [Source:HGNC Symbol;Acc:HGNC:28724]
APOA1	Apolipoprotein A-I Proapolipoprotein A-I Truncated apolipoprotein A-I [Source:UniProtKB/Swiss-Prot;Acc:H0VVW3]
APOA4	apolipoprotein A4 [Source:HGNC Symbol;Acc:HGNC:602]
APOE	apolipoprotein E [Source:HGNC Symbol;Acc:HGNC:613]
APP	amyloid beta precursor protein [Source:HGNC Symbol;Acc:HGNC:620]
APPL1	adaptor protein, phosphotyrosine interacting with PH domain and leucine zipper 1 [Source:HGNC Symbol;Acc:HGNC:24035]
APPL2	adaptor protein, phosphotyrosine interacting with PH domain and leucine zipper 2 [Source:HGNC Symbol;Acc:HGNC:18242]
AQP3	aquaporin 3 (Gill blood group) [Source:HGNC Symbol;Acc:HGNC:636]
ARG2	arginase 2 [Source:HGNC Symbol;Acc:HGNC:664]
ARHGEF2	Rho/Rac guanine nucleotide exchange factor 2 [Source:HGNC Symbol;Acc:HGNC:682]
ARHGEF5	Rho guanine nucleotide exchange factor 5 [Source:HGNC Symbol;Acc:HGNC:13209]
ARHGEF7	Rho guanine nucleotide exchange factor 7 [Source:NCBI gene;Acc:100717780]
ARID5A	AT-rich interaction domain 5A [Source:HGNC Symbol;Acc:HGNC:17361]
ARIH2	ariadne RBR E3 ubiquitin protein ligase 2 [Source:HGNC Symbol;Acc:HGNC:690]
ARMC5	armadillo repeat containing 5 [Source:HGNC Symbol;Acc:HGNC:25781]
ARMC6	armadillo repeat containing 6 [Source:HGNC Symbol;Acc:HGNC:25049]
ARRB2	arrestin beta 2 [Source:HGNC Symbol;Acc:HGNC:712]
ARTN	artemin [Source:HGNC Symbol;Acc:HGNC:727]
ASXL1	ASXL transcriptional regulator 1 [Source:HGNC Symbol;Acc:HGNC:18318]
ATAD3A	ATPase family AAA domain containing 3A [Source:HGNC Symbol;Acc:HGNC:25567]
ATAD5	ATPase family AAA domain containing 5 [Source:HGNC Symbol;Acc:HGNC:25752]
ATF4	activating transcription factor 4 [Source:HGNC Symbol;Acc:HGNC:786]
ATG5	autophagy related 5 [Source:HGNC Symbol;Acc:HGNC:589]
ATG7	autophagy related 7 [Source:NCBI gene;Acc:100730244]
ATM	ATM serine/threonine kinase [Source:NCBI gene;Acc:100717983]
ATP5IF1	ATP synthase inhibitory factor subunit 1 [Source:HGNC Symbol;Acc:HGNC:871]
ATP6AP1	ATPase H+ transporting accessory protein 1 [Source:HGNC Symbol;Acc:HGNC:868]
ATXN1L	ataxin 1 like [Source:HGNC Symbol;Acc:HGNC:33279]
AXL	AXL receptor tyrosine kinase [Source:HGNC Symbol;Acc:HGNC:905]
AZI2	5-azacytidine induced 2 [Source:HGNC Symbol;Acc:HGNC:24002]
B2M	beta-2-microglobulin [Source:HGNC Symbol;Acc:HGNC:914]
B4GALT1	beta-1,4-galactosyltransferase 1 [Source:HGNC Symbol;Acc:HGNC:924]
BAG6	BCL2 associated athanogene 6 [Source:HGNC Symbol;Acc:HGNC:13919]
BAK1	BCL2 antagonist/killer 1 [Source:HGNC Symbol;Acc:HGNC:949]
BAP1	BRCA1 associated protein 1 [Source:HGNC Symbol;Acc:HGNC:950]
BARX1	BARX homeobox 1 [Source:HGNC Symbol;Acc:HGNC:955]
BATF2	basic leucine zipper ATF-like transcription factor 2 [Source:HGNC Symbol;Acc:HGNC:25163]
BATF3	basic leucine zipper ATF-like transcription factor 3 [Source:HGNC Symbol;Acc:HGNC:28915]
BAX	BCL2 associated X, apoptosis regulator [Source:HGNC Symbol;Acc:HGNC:959]
BCAR1	BCAR1 scaffold protein, Cas family member [Source:HGNC Symbol;Acc:HGNC:971]
BCL10	BCL10 immune signaling adaptor [Source:HGNC Symbol;Acc:HGNC:989]
BCL11B	BAF chromatin remodeling complex subunit BCL11B [Source:HGNC Symbol;Acc:HGNC:13222]
BCL2	BCL2 apoptosis regulator [Source:HGNC Symbol;Acc:HGNC:990]
BCL2L11	BCL2 like 11 [Source:NCBI gene;Acc:100725284]
BCL3	BCL3 transcription coactivator [Source:HGNC Symbol;Acc:HGNC:998]
BCL6	BCL6 transcription repressor [Source:HGNC Symbol;Acc:HGNC:1001]
BCR	BCR activator of RhoGEF and GTPase [Source:HGNC Symbol;Acc:HGNC:1014]
BECN1	beclin 1 [Source:HGNC Symbol;Acc:HGNC:1034]
BLK	BLK proto-oncogene, Src family tyrosine kinase [Source:HGNC Symbol;Acc:HGNC:1057]
BLNK	B cell linker [Source:HGNC Symbol;Acc:HGNC:14211]
BLOC1S3	biogenesis of lysosomal organelles complex 1 subunit 3 [Source:HGNC Symbol;Acc:HGNC:20914]
BLOC1S6	biogenesis of lysosomal organelles complex 1 subunit 6 [Source:HGNC Symbol;Acc:HGNC:8549]
BMP4	bone morphogenetic protein 4 [Source:HGNC Symbol;Acc:HGNC:1071]
BMPR1A	bone morphogenetic protein receptor type 1A [Source:HGNC Symbol;Acc:HGNC:1076]
BNIP3	BCL2 interacting protein 3 [Source:HGNC Symbol;Acc:HGNC:1084]
BNIP3L	BCL2 interacting protein 3 like [Source:NCBI gene;Acc:100733852]
BPIFA1	BPI fold containing family A member 1 [Source:HGNC Symbol;Acc:HGNC:15749]
BPIFB1	BPI fold containing family B member 1 [Source:HGNC Symbol;Acc:HGNC:16108]
BPIFB3	BPI fold containing family B member 3 [Source:HGNC Symbol;Acc:HGNC:16178]
BRAF	B-Raf proto-oncogene, serine/threonine kinase [Source:HGNC Symbol;Acc:HGNC:1097]
BRD1	bromodomain containing 1 [Source:HGNC Symbol;Acc:HGNC:1102]
BSG	basigin (Ok blood group) [Source:HGNC Symbol;Acc:HGNC:1116]
BTK	Bruton tyrosine kinase [Source:NCBI gene;Acc:100714123]
BTLA	B and T lymphocyte associated [Source:HGNC Symbol;Acc:HGNC:21087]
BTN2A2	butyrophilin subfamily 2 member A2 [Source:HGNC Symbol;Acc:HGNC:1137]
BTNL2	butyrophilin like 2 [Source:HGNC Symbol;Acc:HGNC:1142]
BVES	blood vessel epicardial substance [Source:HGNC Symbol;Acc:HGNC:1152]
C12orf29	chromosome 12 open reading frame 29 [Source:HGNC Symbol;Acc:HGNC:25322]
C1QA	complement C1q A chain [Source:HGNC Symbol;Acc:HGNC:1241]
C1QB	complement C1q B chain [Source:HGNC Symbol;Acc:HGNC:1242]
C1QBP	complement C1q binding protein [Source:HGNC Symbol;Acc:HGNC:1243]
C1QC	complement C1q C chain [Source:HGNC Symbol;Acc:HGNC:1245]
C1S	complement C1s [Source:HGNC Symbol;Acc:HGNC:1247]
C3AR1	C3a anaphylatoxin chemotactic receptor [Source:UniProtKB/Swiss-Prot;Acc:O88680]
C4BPA	complement component 4 binding protein alpha [Source:NCBI gene;Acc:100379238]
C4BPB	complement component 4 binding protein beta [Source:HGNC Symbol;Acc:HGNC:1328]
C5	complement C5 [Source:HGNC Symbol;Acc:HGNC:1331]
C5AR1	complement C5a receptor 1 [Source:HGNC Symbol;Acc:HGNC:1338]
C5AR2	complement component 5a receptor 2 [Source:HGNC Symbol;Acc:HGNC:4527]
C6	complement C6 [Source:HGNC Symbol;Acc:HGNC:1339]
C7	complement C7 [Source:HGNC Symbol;Acc:HGNC:1346]
C8A	complement C8 alpha chain [Source:HGNC Symbol;Acc:HGNC:1352]
C8B	complement C8 beta chain [Source:HGNC Symbol;Acc:HGNC:1353]
C8G	complement C8 gamma chain [Source:HGNC Symbol;Acc:HGNC:1354]
CACNA1F	calcium voltage-gated channel subunit alpha1 F [Source:HGNC Symbol;Acc:HGNC:1393]
CACNB3	calcium voltage-gated channel auxiliary subunit beta 3 [Source:HGNC Symbol;Acc:HGNC:1403]
CACTIN	cactin, spliceosome C complex subunit [Source:HGNC Symbol;Acc:HGNC:29938]
CADM1	cell adhesion molecule 1 [Source:HGNC Symbol;Acc:HGNC:5951]
CALCOCO2	calcium binding and coiled-coil domain 2 [Source:HGNC Symbol;Acc:HGNC:29912]
CALCR	calcitonin receptor [Source:HGNC Symbol;Acc:HGNC:1440]
CALR	calreticulin [Source:HGNC Symbol;Acc:HGNC:1455]
CAMK1D	calcium/calmodulin dependent protein kinase ID [Source:HGNC Symbol;Acc:HGNC:19341]
CAMK4	calcium/calmodulin dependent protein kinase IV [Source:HGNC Symbol;Acc:HGNC:1464]
CARD11	caspase recruitment domain family member 11 [Source:HGNC Symbol;Acc:HGNC:16393]
CARD9	caspase recruitment domain family member 9 [Source:HGNC Symbol;Acc:HGNC:16391]
CASP8	caspase 8 [Source:HGNC Symbol;Acc:HGNC:1509]
CAV1	caveolin 1 [Source:HGNC Symbol;Acc:HGNC:1527]
CBFA2T3	CBFA2/RUNX1 partner transcriptional co-repressor 3 [Source:HGNC Symbol;Acc:HGNC:1537]
CBLB	Cbl proto-oncogene B [Source:HGNC Symbol;Acc:HGNC:1542]
CCDC134	coiled-coil domain containing 134 [Source:HGNC Symbol;Acc:HGNC:26185]
CCDC88B	coiled-coil domain containing 88B [Source:HGNC Symbol;Acc:HGNC:26757]
CCL11	Eotaxin [Source:UniProtKB/Swiss-Prot;Acc:P80325]
CCL17	C-C motif chemokine ligand 17 [Source:HGNC Symbol;Acc:HGNC:10615]
CCL19	C-C motif chemokine ligand 19 [Source:HGNC Symbol;Acc:HGNC:10617]
CCL20	C-C motif chemokine ligand 20 [Source:HGNC Symbol;Acc:HGNC:10619]
CCL21	C-C motif chemokine ligand 21 [Source:HGNC Symbol;Acc:HGNC:10620]
CCL22	C-C motif chemokine ligand 22 [Source:NCBI gene;Acc:100716085]
CCL27	C-C motif chemokine ligand 27 [Source:HGNC Symbol;Acc:HGNC:10626]
CCL7	C-C motif chemokine ligand 7 [Source:HGNC Symbol;Acc:HGNC:10634]
CCN3	cellular communication network factor 3 [Source:HGNC Symbol;Acc:HGNC:7885]
CCN4	cellular communication network factor 4 [Source:HGNC Symbol;Acc:HGNC:12769]
CCND3	cyclin D3 [Source:HGNC Symbol;Acc:HGNC:1585]
CCR10	C-C motif chemokine receptor 10 [Source:HGNC Symbol;Acc:HGNC:4474]
Ccr4	C-C motif chemokine receptor 4 [Source:NCBI gene;Acc:100379615]
CCR6	C-C motif chemokine receptor 6 [Source:HGNC Symbol;Acc:HGNC:1607]
CCR7	C-C motif chemokine receptor 7 [Source:HGNC Symbol;Acc:HGNC:1608]
CCR8	C-C motif chemokine receptor 8 [Source:HGNC Symbol;Acc:HGNC:1609]
CCR9	C-C motif chemokine receptor 9 [Source:HGNC Symbol;Acc:HGNC:1610]
CD101	CD101 molecule [Source:HGNC Symbol;Acc:HGNC:5949]
CD109	CD109 molecule [Source:HGNC Symbol;Acc:HGNC:21685]
CD151	CD151 molecule (Raph blood group) [Source:HGNC Symbol;Acc:HGNC:1630]
CD200	CD200 molecule [Source:HGNC Symbol;Acc:HGNC:7203]
CD207	CD207 molecule [Source:HGNC Symbol;Acc:HGNC:17935]
CD22	CD22 molecule [Source:NCBI gene;Acc:100720690]
CD247	CD247 molecule [Source:HGNC Symbol;Acc:HGNC:1677]
CD248	CD248 molecule [Source:HGNC Symbol;Acc:HGNC:18219]
CD274	CD274 molecule [Source:HGNC Symbol;Acc:HGNC:17635]
CD276	CD276 molecule [Source:HGNC Symbol;Acc:HGNC:19137]
CD28	CD28 molecule [Source:HGNC Symbol;Acc:HGNC:1653]
CD300A	CD300a molecule [Source:HGNC Symbol;Acc:HGNC:19319]
CD320	CD320 molecule [Source:HGNC Symbol;Acc:HGNC:16692]
CD34	CD34 molecule [Source:HGNC Symbol;Acc:HGNC:1662]
CD36	CD36 molecule [Source:HGNC Symbol;Acc:HGNC:1663]
CD40	CD40 molecule [Source:HGNC Symbol;Acc:HGNC:11919]
CD40LG	CD40 ligand [Source:HGNC Symbol;Acc:HGNC:11935]
CD44	CD44 molecule (Indian blood group) [Source:HGNC Symbol;Acc:HGNC:1681]
CD47	CD47 molecule [Source:HGNC Symbol;Acc:HGNC:1682]
CD5	CD5 molecule [Source:HGNC Symbol;Acc:HGNC:1685]
CD5L	CD5 molecule like [Source:HGNC Symbol;Acc:HGNC:1690]
CD74	CD74 molecule [Source:HGNC Symbol;Acc:HGNC:1697]
CD79B	CD79b molecule [Source:HGNC Symbol;Acc:HGNC:1699]
CD81	CD81 molecule [Source:HGNC Symbol;Acc:HGNC:1701]
CD83	CD83 molecule [Source:HGNC Symbol;Acc:HGNC:1703]
CD84	CD84 molecule [Source:HGNC Symbol;Acc:HGNC:1704]
CD9	CD9 molecule [Source:HGNC Symbol;Acc:HGNC:1709]
CD96	CD96 molecule [Source:HGNC Symbol;Acc:HGNC:16892]
CD99L2	CD99 molecule like 2 [Source:HGNC Symbol;Acc:HGNC:18237]
CDC37	cell division cycle 37 [Source:HGNC Symbol;Acc:HGNC:1735]
CDC42	cell division cycle 42 [Source:HGNC Symbol;Acc:HGNC:1736]
CDC42EP2	CDC42 effector protein 2 [Source:HGNC Symbol;Acc:HGNC:16263]
CDC42EP4	CDC42 effector protein 4 [Source:HGNC Symbol;Acc:HGNC:17147]
CDC73	cell division cycle 73 [Source:HGNC Symbol;Acc:HGNC:16783]
CDIN1	chromosome 15 open reading frame 41 [Source:HGNC Symbol;Acc:HGNC:26929]
CDK5RAP3	CDK5 regulatory subunit associated protein 3 [Source:HGNC Symbol;Acc:HGNC:18673]
CDK6	cyclin dependent kinase 6 [Source:HGNC Symbol;Acc:HGNC:1777]
CDKN1A	cyclin dependent kinase inhibitor 1A [Source:HGNC Symbol;Acc:HGNC:1784]
CDKN2B	cyclin dependent kinase inhibitor 2B [Source:HGNC Symbol;Acc:HGNC:1788]
CEBPB	CCAAT enhancer binding protein beta [Source:HGNC Symbol;Acc:HGNC:1834]
CEBPE	CCAAT enhancer binding protein epsilon [Source:HGNC Symbol;Acc:HGNC:1836]
CFP	complement factor properdin [Source:HGNC Symbol;Acc:HGNC:8864]
CH25H	cholesterol 25-hydroxylase [Source:HGNC Symbol;Acc:HGNC:1907]
CHD7	chromodomain helicase DNA binding protein 7 [Source:HGNC Symbol;Acc:HGNC:20626]
CHGA	chromogranin A [Source:HGNC Symbol;Acc:HGNC:1929]
CIAO3	cytosolic iron-sulfur assembly component 3 [Source:HGNC Symbol;Acc:HGNC:14179]
CIAPIN1	cytokine induced apoptosis inhibitor 1 [Source:HGNC Symbol;Acc:HGNC:28050]
CIB1	calcium and integrin binding 1 [Source:HGNC Symbol;Acc:HGNC:16920]
CIITA	class II major histocompatibility complex transactivator [Source:HGNC Symbol;Acc:HGNC:7067]
CITED2	Cbp/p300 interacting transactivator with Glu/Asp rich carboxy-terminal domain 2 [Source:HGNC Symbol;Acc:HGNC:1987]
CKLF	chemokine like factor [Source:HGNC Symbol;Acc:HGNC:13253]
CLCF1	cardiotrophin like cytokine factor 1 [Source:HGNC Symbol;Acc:HGNC:17412]
CLDN18	claudin 18 [Source:HGNC Symbol;Acc:HGNC:2039]
CLEC1B	C-type lectin domain family 1 member B [Source:HGNC Symbol;Acc:HGNC:24356]
CLEC4E	C-type lectin domain family 4 member E [Source:HGNC Symbol;Acc:HGNC:14555]
CLEC5A	C-type lectin domain containing 5A [Source:HGNC Symbol;Acc:HGNC:2054]
CLEC7A	C-type lectin domain containing 7A [Source:HGNC Symbol;Acc:HGNC:14558]
CLPTM1	CLPTM1 regulator of GABA type A receptor forward trafficking [Source:HGNC Symbol;Acc:HGNC:2087]
CMKLR1	chemerin chemokine-like receptor 1 [Source:HGNC Symbol;Acc:HGNC:2121]
CMTM7	CKLF like MARVEL transmembrane domain containing 7 [Source:HGNC Symbol;Acc:HGNC:19178]
CNOT4	CCR4-NOT transcription complex subunit 4 [Source:HGNC Symbol;Acc:HGNC:7880]
CNOT7	CCR4-NOT transcription complex subunit 7 [Source:HGNC Symbol;Acc:HGNC:14101]
CNR2	cannabinoid receptor 2 [Source:HGNC Symbol;Acc:HGNC:2160]
COL3A1	collagen type III alpha 1 chain [Source:HGNC Symbol;Acc:HGNC:2201]
COLEC11	collectin subfamily member 11 [Source:HGNC Symbol;Acc:HGNC:17213]
COLEC12	collectin subfamily member 12 [Source:HGNC Symbol;Acc:HGNC:16016]
CORO1A	coronin 1A [Source:HGNC Symbol;Acc:HGNC:2252]
CR2	complement C3d receptor 2 [Source:HGNC Symbol;Acc:HGNC:2336]
CREB1	cAMP responsive element binding protein 1 [Source:HGNC Symbol;Acc:HGNC:2345]
CREB3	cAMP responsive element binding protein 3 [Source:HGNC Symbol;Acc:HGNC:2347]
CRIP2	cysteine rich protein 2 [Source:HGNC Symbol;Acc:HGNC:2361]
CRK	CRK proto-oncogene, adaptor protein [Source:HGNC Symbol;Acc:HGNC:2362]
CRKL	CRK like proto-oncogene, adaptor protein [Source:HGNC Symbol;Acc:HGNC:2363]
CRTAM	cytotoxic and regulatory T cell molecule [Source:HGNC Symbol;Acc:HGNC:24313]
CRTC3	CREB regulated transcription coactivator 3 [Source:HGNC Symbol;Acc:HGNC:26148]
CSF2	colony stimulating factor 2 [Source:HGNC Symbol;Acc:HGNC:2434]
CSF3	colony stimulating factor 3 [Source:HGNC Symbol;Acc:HGNC:2438]
CST7	cystatin F [Source:HGNC Symbol;Acc:HGNC:2479]
CTC1	CST telomere replication complex component 1 [Source:HGNC Symbol;Acc:HGNC:26169]
CTLA4	cytotoxic T-lymphocyte associated protein 4 [Source:HGNC Symbol;Acc:HGNC:2505]
CTNNB1	catenin beta 1 [Source:HGNC Symbol;Acc:HGNC:2514]
CTNNBIP1	catenin beta interacting protein 1 [Source:HGNC Symbol;Acc:HGNC:16913]
CTPS1	CTP synthase 1 [Source:HGNC Symbol;Acc:HGNC:2519]
CTR9	CTR9 homolog, Paf1/RNA polymerase II complex component [Source:HGNC Symbol;Acc:HGNC:16850]
CTSC	cathepsin C [Source:HGNC Symbol;Acc:HGNC:2528]
CTSE	Cathepsin E [Source:UniProtKB/Swiss-Prot;Acc:P25796]
CTSH	cathepsin H [Source:HGNC Symbol;Acc:HGNC:2535]
CUEDC2	CUE domain containing 2 [Source:HGNC Symbol;Acc:HGNC:28352]
CUL4A	cullin 4A [Source:HGNC Symbol;Acc:HGNC:2554]
CX3CL1	C-X3-C motif chemokine ligand 1 [Source:HGNC Symbol;Acc:HGNC:10647]
CX3CR1	C-X3-C motif chemokine receptor 1 [Source:HGNC Symbol;Acc:HGNC:2558]
CXCL11	C-X-C motif chemokine ligand 11 [Source:HGNC Symbol;Acc:HGNC:10638]
CXCL12	C-X-C motif chemokine ligand 12 [Source:HGNC Symbol;Acc:HGNC:10672]
CXCL14	C-X-C motif chemokine ligand 14 [Source:HGNC Symbol;Acc:HGNC:10640]
CXCL17	C-X-C motif chemokine ligand 17 [Source:HGNC Symbol;Acc:HGNC:19232]
CXCL6	C-X-C motif chemokine ligand 6 [Source:HGNC Symbol;Acc:HGNC:10643]
CXCL9	C-X-C motif chemokine ligand 9 [Source:HGNC Symbol;Acc:HGNC:7098]
CXCR3	C-X-C motif chemokine receptor 3 [Source:HGNC Symbol;Acc:HGNC:4540]
CXCR5	C-X-C motif chemokine receptor 5 [Source:NCBI gene;Acc:100723743]
CYBA	cytochrome b-245 alpha chain [Source:HGNC Symbol;Acc:HGNC:2577]
CYBB	cytochrome b-245 beta chain [Source:HGNC Symbol;Acc:HGNC:2578]
CYBC1	cytochrome b-245 chaperone 1 [Source:HGNC Symbol;Acc:HGNC:28672]
CYLD	CYLD lysine 63 deubiquitinase [Source:HGNC Symbol;Acc:HGNC:2584]
CYP19A1	cytochrome P450 family 19 subfamily A member 1 [Source:HGNC Symbol;Acc:HGNC:2594]
CYP26B1	cytochrome P450 family 26 subfamily B member 1 [Source:HGNC Symbol;Acc:HGNC:20581]
CYP27B1	cytochrome P450 family 27 subfamily B member 1 [Source:HGNC Symbol;Acc:HGNC:2606]
CYP7B1	cytochrome P450 family 7 subfamily B member 1 [Source:HGNC Symbol;Acc:HGNC:2652]
CYRIB	family with sequence similarity 49 member B [Source:NCBI gene;Acc:100723807]
CYSLTR1	Cysteinyl leukotriene receptor 1 [Source:UniProtKB/Swiss-Prot;Acc:Q2NNR5]
DAPK1	death associated protein kinase 1 [Source:HGNC Symbol;Acc:HGNC:2674]
DAPK3	death associated protein kinase 3 [Source:HGNC Symbol;Acc:HGNC:2676]
DBH	dopamine beta-hydroxylase [Source:HGNC Symbol;Acc:HGNC:2689]
DCAF1	DDB1 and CUL4 associated factor 1 [Source:HGNC Symbol;Acc:HGNC:30911]
DCAF15	DDB1 and CUL4 associated factor 15 [Source:HGNC Symbol;Acc:HGNC:25095]
DCLRE1C	DNA cross-link repair 1C [Source:HGNC Symbol;Acc:HGNC:17642]
DCST1	DC-STAMP domain containing 1 [Source:HGNC Symbol;Acc:HGNC:26539]
DCSTAMP	dendrocyte expressed seven transmembrane protein [Source:HGNC Symbol;Acc:HGNC:18549]
DDIT4	DNA damage inducible transcript 4 [Source:HGNC Symbol;Acc:HGNC:24944]
DDOST	dolichyl-diphosphooligosaccharide--protein glycosyltransferase non-catalytic subunit [Source:HGNC Symbol;Acc:HGNC:2728]
DDX21	DExD-box helicase 21 [Source:HGNC Symbol;Acc:HGNC:2744]
DDX60	DExD/H-box helicase 60 [Source:HGNC Symbol;Acc:HGNC:25942]
DEFB110	defensin beta 110 [Source:HGNC Symbol;Acc:HGNC:18091]
DEFB113	defensin beta 113 [Source:NCBI gene;Acc:111758247]
DEFB123	defensin beta 123 [Source:HGNC Symbol;Acc:HGNC:18103]
DEFB124	defensin beta 124 [Source:HGNC Symbol;Acc:HGNC:18104]
DEFB127	defensin beta 127 [Source:NCBI gene;Acc:100735403]
DENND1B	DENN domain containing 1B [Source:HGNC Symbol;Acc:HGNC:28404]
DHPS	deoxyhypusine synthase [Source:NCBI gene;Acc:100730909]
DHRS7B	dehydrogenase/reductase 7B [Source:HGNC Symbol;Acc:HGNC:24547]
DHTKD1	dehydrogenase E1 and transketolase domain containing 1 [Source:HGNC Symbol;Acc:HGNC:23537]
DHX36	DEAH-box helicase 36 [Source:HGNC Symbol;Acc:HGNC:14410]
DHX58	DExH-box helicase 58 [Source:HGNC Symbol;Acc:HGNC:29517]
DLG1	discs large MAGUK scaffold protein 1 [Source:HGNC Symbol;Acc:HGNC:2900]
DLG5	discs large MAGUK scaffold protein 5 [Source:HGNC Symbol;Acc:HGNC:2904]
DLL1	delta like canonical Notch ligand 1 [Source:HGNC Symbol;Acc:HGNC:2908]
DLL4	delta like canonical Notch ligand 4 [Source:HGNC Symbol;Acc:HGNC:2910]
DMTN	dematin actin binding protein [Source:HGNC Symbol;Acc:HGNC:3382]
DNAJA3	DnaJ heat shock protein family (Hsp40) member A3 [Source:HGNC Symbol;Acc:HGNC:11808]
DNAJB9	DnaJ heat shock protein family (Hsp40) member B9 [Source:HGNC Symbol;Acc:HGNC:6968]
DNASE1L3	deoxyribonuclease 1 like 3 [Source:HGNC Symbol;Acc:HGNC:2959]
DNASE2	deoxyribonuclease 2, lysosomal [Source:HGNC Symbol;Acc:HGNC:2960]
DNM1L	dynamin 1 like [Source:HGNC Symbol;Acc:HGNC:2973]
DOCK1	dedicator of cytokinesis 1 [Source:HGNC Symbol;Acc:HGNC:2987]
DOCK11	dedicator of cytokinesis 11 [Source:HGNC Symbol;Acc:HGNC:23483]
DOCK2	dedicator of cytokinesis 2 [Source:HGNC Symbol;Acc:HGNC:2988]
DOCK8	dedicator of cytokinesis 8 [Source:HGNC Symbol;Acc:HGNC:19191]
DPEP1	dipeptidase 1 [Source:HGNC Symbol;Acc:HGNC:3002]
DRD2	dopamine receptor D2 [Source:HGNC Symbol;Acc:HGNC:3023]
DROSHA	drosha ribonuclease III [Source:HGNC Symbol;Acc:HGNC:17904]
DTX3L	deltex E3 ubiquitin ligase 3L [Source:HGNC Symbol;Acc:HGNC:30323]
DUSP1	dual specificity phosphatase 1 [Source:HGNC Symbol;Acc:HGNC:3064]
DUSP10	dual specificity phosphatase 10 [Source:HGNC Symbol;Acc:HGNC:3065]
DUSP22	dual specificity phosphatase 22 [Source:HGNC Symbol;Acc:HGNC:16077]
DYRK3	dual specificity tyrosine phosphorylation regulated kinase 3 [Source:HGNC Symbol;Acc:HGNC:3094]
DYSF	dysferlin [Source:HGNC Symbol;Acc:HGNC:3097]
EBI3	Epstein-Barr virus induced 3 [Source:HGNC Symbol;Acc:HGNC:3129]
EDA	ectodysplasin A [Source:HGNC Symbol;Acc:HGNC:3157]
EDN2	endothelin 2 [Source:HGNC Symbol;Acc:HGNC:3177]
EDN3	endothelin 3 [Source:HGNC Symbol;Acc:HGNC:3178]
EDNRB	endothelin receptor type B [Source:HGNC Symbol;Acc:HGNC:3180]
EEF2	eukaryotic translation elongation factor 2 [Source:HGNC Symbol;Acc:HGNC:3214]
EFNA2	ephrin A2 [Source:HGNC Symbol;Acc:HGNC:3222]
EFNB1	ephrin B1 [Source:HGNC Symbol;Acc:HGNC:3226]
EFNB2	ephrin B2 [Source:NCBI gene;Acc:100731778]
EFNB3	ephrin B3 [Source:HGNC Symbol;Acc:HGNC:3228]
EGR3	early growth response 3 [Source:HGNC Symbol;Acc:HGNC:3240]
EIF2AK1	eukaryotic translation initiation factor 2 alpha kinase 1 [Source:HGNC Symbol;Acc:HGNC:24921]
EIF2B1	eukaryotic translation initiation factor 2B subunit alpha [Source:HGNC Symbol;Acc:HGNC:3257]
EIF2B2	eukaryotic translation initiation factor 2B subunit beta [Source:HGNC Symbol;Acc:HGNC:3258]
EIF2B3	eukaryotic translation initiation factor 2B subunit gamma [Source:HGNC Symbol;Acc:HGNC:3259]
EIF6	eukaryotic translation initiation factor 6 [Source:HGNC Symbol;Acc:HGNC:6159]
ELANE	elastase, neutrophil expressed [Source:HGNC Symbol;Acc:HGNC:3309]
ELF1	E74 like ETS transcription factor 1 [Source:HGNC Symbol;Acc:HGNC:3316]
ELF4	E74 like ETS transcription factor 4 [Source:HGNC Symbol;Acc:HGNC:3319]
ELMOD2	ELMO domain containing 2 [Source:HGNC Symbol;Acc:HGNC:28111]
EML1	EMAP like 1 [Source:HGNC Symbol;Acc:HGNC:3330]
EMP2	epithelial membrane protein 2 [Source:HGNC Symbol;Acc:HGNC:3334]
ENPP1	ectonucleotide pyrophosphatase/phosphodiesterase 1 [Source:HGNC Symbol;Acc:HGNC:3356]
ENPP3	ectonucleotide pyrophosphatase/phosphodiesterase 3 [Source:HGNC Symbol;Acc:HGNC:3358]
ENSCPOG00000000167	nan
ENSCPOG00000000422	Neutrophil cationic peptide 1 type A Neutrophil cationic peptide 1 [Source:UniProtKB/Swiss-Prot;Acc:P11478]
ENSCPOG00000000474	nan
ENSCPOG00000000866	nan
ENSCPOG00000001300	nan
ENSCPOG00000001379	nan
ENSCPOG00000001598	DExD/H-box helicase 58 [Source:HGNC Symbol;Acc:HGNC:19102]
ENSCPOG00000001973	nan
ENSCPOG00000002224	nan
ENSCPOG00000002330	nan
ENSCPOG00000002427	HLA class II histocompatibility antigen, DP alpha 1 chain-like [Source:NCBI gene;Acc:100715615]
ENSCPOG00000002495	nan
ENSCPOG00000002689	nan
ENSCPOG00000002810	nan
ENSCPOG00000002925	nan
ENSCPOG00000002971	nan
ENSCPOG00000003100	nan
ENSCPOG00000003156	vitronectin [Source:HGNC Symbol;Acc:HGNC:12724]
ENSCPOG00000003574	nan
ENSCPOG00000003707	nan
ENSCPOG00000004199	nan
ENSCPOG00000004214	nan
ENSCPOG00000004634	nan
ENSCPOG00000004731	nan
ENSCPOG00000004859	nan
ENSCPOG00000005467	nan
ENSCPOG00000005800	chromodomain helicase DNA binding protein 2 [Source:HGNC Symbol;Acc:HGNC:1917]
ENSCPOG00000005813	nan
ENSCPOG00000006019	SAM domain, SH3 domain and nuclear localization signals 1 [Source:HGNC Symbol;Acc:HGNC:10528]
ENSCPOG00000006927	nan
ENSCPOG00000006932	nan
ENSCPOG00000007340	midkine [Source:HGNC Symbol;Acc:HGNC:6972]
ENSCPOG00000007538	nan
ENSCPOG00000007659	nan
ENSCPOG00000008049	nan
ENSCPOG00000008118	nan
ENSCPOG00000008143	nan
ENSCPOG00000008303	nan
ENSCPOG00000008390	nan
ENSCPOG00000008449	CD27 molecule [Source:HGNC Symbol;Acc:HGNC:11922]
ENSCPOG00000008939	nan
ENSCPOG00000009092	nan
ENSCPOG00000009459	nan
ENSCPOG00000009816	nan
ENSCPOG00000010075	CXADR Ig-like cell adhesion molecule [Source:HGNC Symbol;Acc:HGNC:2559]
ENSCPOG00000010118	nan
ENSCPOG00000010375	nan
ENSCPOG00000010467	nan
ENSCPOG00000011275	nan
ENSCPOG00000011605	plasminogen [Source:HGNC Symbol;Acc:HGNC:9071]
ENSCPOG00000011622	nan
ENSCPOG00000011627	methionine sulfoxide reductase B1 [Source:HGNC Symbol;Acc:HGNC:14133]
ENSCPOG00000011889	CD79a molecule [Source:HGNC Symbol;Acc:HGNC:1698]
ENSCPOG00000012335	folliculin [Source:HGNC Symbol;Acc:HGNC:27310]
ENSCPOG00000013468	C-C motif chemokine 2 [Source:UniProtKB/Swiss-Prot;Acc:Q08782]
ENSCPOG00000014151	3-beta-hydroxysteroid-Delta(8),Delta(7)-isomerase [Source:UniProtKB/Swiss-Prot;Acc:Q60490]
ENSCPOG00000014306	nan
ENSCPOG00000014840	Neutrophil cationic peptide 2 [Source:UniProtKB/Swiss-Prot;Acc:P49112]
ENSCPOG00000015358	RAB guanine nucleotide exchange factor 1 [Source:HGNC Symbol;Acc:HGNC:17676]
ENSCPOG00000015519	nan
ENSCPOG00000019294	nan
ENSCPOG00000019730	nan
ENSCPOG00000020121	calponin 2 [Source:HGNC Symbol;Acc:HGNC:2156]
ENSCPOG00000020724	nan
ENSCPOG00000020935	nan
ENSCPOG00000021662	nan
ENSCPOG00000022044	nan
ENSCPOG00000022081	nan
ENSCPOG00000022242	nan
ENSCPOG00000022445	nan
ENSCPOG00000022803	nan
ENSCPOG00000023019	nan
ENSCPOG00000023405	nan
ENSCPOG00000024142	nan
ENSCPOG00000024324	nan
ENSCPOG00000024719	nan
ENSCPOG00000025018	nan
ENSCPOG00000025260	nan
ENSCPOG00000025340	nan
ENSCPOG00000025428	nan
ENSCPOG00000025439	beta-defensin 123-like [Source:NCBI gene;Acc:100734844]
ENSCPOG00000025682	nan
ENSCPOG00000025775	serpin family G member 1 [Source:HGNC Symbol;Acc:HGNC:1228]
ENSCPOG00000026052	nan
ENSCPOG00000026146	interferon regulatory factor 3 [Source:HGNC Symbol;Acc:HGNC:6118]
ENSCPOG00000026381	nan
ENSCPOG00000026400	nan
ENSCPOG00000026714	nan
ENSCPOG00000026958	nan
ENSCPOG00000027262	nan
ENSCPOG00000027455	nan
ENSCPOG00000027540	nan
ENSCPOG00000030533	nan
ENSCPOG00000031015	nan
ENSCPOG00000031420	nan
ENSCPOG00000031422	nan
ENSCPOG00000031840	nan
ENSCPOG00000032022	nan
ENSCPOG00000032037	nan
ENSCPOG00000032102	nan
ENSCPOG00000032467	nan
ENSCPOG00000032648	nan
ENSCPOG00000032867	nan
ENSCPOG00000033402	nan
ENSCPOG00000033588	interferon alpha-17-like [Source:NCBI gene;Acc:100724988]
ENSCPOG00000033649	nan
ENSCPOG00000033663	nan
ENSCPOG00000033808	nan
ENSCPOG00000034366	nan
ENSCPOG00000034913	nan
ENSCPOG00000035412	nan
ENSCPOG00000035450	nan
ENSCPOG00000035680	nan
ENSCPOG00000035809	nan
ENSCPOG00000035813	nan
ENSCPOG00000036041	interferon alpha-17-like [Source:NCBI gene;Acc:100726990]
ENSCPOG00000036465	HLA class II histocompatibility antigen, DRB1-1 beta chain-like [Source:NCBI gene;Acc:100720894]
ENSCPOG00000036528	nan
ENSCPOG00000036700	nan
ENSCPOG00000036826	nan
ENSCPOG00000037138	nan
ENSCPOG00000037313	nan
ENSCPOG00000037328	interleukin-36 beta-like [Source:NCBI gene;Acc:100712719]
ENSCPOG00000037617	nan
ENSCPOG00000038037	nan
ENSCPOG00000038111	nan
ENSCPOG00000038269	nan
ENSCPOG00000038301	nan
ENSCPOG00000038603	nan
ENSCPOG00000038697	nan
ENSCPOG00000038816	nan
ENSCPOG00000039282	nan
ENSCPOG00000040021	cholinergic receptor nicotinic alpha 7 subunit [Source:HGNC Symbol;Acc:HGNC:1960]
ENSCPOG00000040083	nan
ENSCPOG00000040095	nan
ENSCPOG00000040372	nan
ENSCPOG00000040651	nan
ENTPD7	ectonucleoside triphosphate diphosphohydrolase 7 [Source:HGNC Symbol;Acc:HGNC:19745]
EOMES	eomesodermin [Source:HGNC Symbol;Acc:HGNC:3372]
EP300	E1A binding protein p300 [Source:HGNC Symbol;Acc:HGNC:3373]
EPAS1	endothelial PAS domain protein 1 [Source:HGNC Symbol;Acc:HGNC:3374]
EPHA2	EPH receptor A2 [Source:HGNC Symbol;Acc:HGNC:3386]
EPO	erythropoietin [Source:HGNC Symbol;Acc:HGNC:3415]
EPRS1	glutamyl-prolyl-tRNA synthetase 1 [Source:NCBI gene;Acc:100714693]
EPS8	epidermal growth factor receptor pathway substrate 8 [Source:HGNC Symbol;Acc:HGNC:3420]
EPX	eosinophil peroxidase [Source:HGNC Symbol;Acc:HGNC:3423]
ERAP1	endoplasmic reticulum aminopeptidase 1 [Source:HGNC Symbol;Acc:HGNC:18173]
ERBB2	erb-b2 receptor tyrosine kinase 2 [Source:HGNC Symbol;Acc:HGNC:3430]
ERCC1	ERCC excision repair 1, endonuclease non-catalytic subunit [Source:HGNC Symbol;Acc:HGNC:3433]
ERCC2	ERCC excision repair 2, TFIIH core complex helicase subunit [Source:HGNC Symbol;Acc:HGNC:3434]
EREG	epiregulin [Source:HGNC Symbol;Acc:HGNC:3443]
ETS1	ETS proto-oncogene 1, transcription factor [Source:NCBI gene;Acc:100724487]
ETV6	ETS variant transcription factor 6 [Source:HGNC Symbol;Acc:HGNC:3495]
EVI2B	ecotropic viral integration site 2B [Source:HGNC Symbol;Acc:HGNC:3500]
EXOSC3	exosome component 3 [Source:HGNC Symbol;Acc:HGNC:17944]
EXOSC5	exosome component 5 [Source:HGNC Symbol;Acc:HGNC:24662]
EXT1	exostosin glycosyltransferase 1 [Source:HGNC Symbol;Acc:HGNC:3512]
EZH2	enhancer of zeste 2 polycomb repressive complex 2 subunit [Source:HGNC Symbol;Acc:HGNC:3527]
EZR	ezrin [Source:HGNC Symbol;Acc:HGNC:12691]
F11R	F11 receptor [Source:HGNC Symbol;Acc:HGNC:14685]
F2RL1	F2R like trypsin receptor 1 [Source:HGNC Symbol;Acc:HGNC:3538]
FADD	Fas associated via death domain [Source:HGNC Symbol;Acc:HGNC:3573]
FAM20C	FAM20C golgi associated secretory pathway kinase [Source:HGNC Symbol;Acc:HGNC:22140]
FAM210B	family with sequence similarity 210 member B [Source:HGNC Symbol;Acc:HGNC:16102]
FANCA	FA complementation group A [Source:HGNC Symbol;Acc:HGNC:3582]
FANCC	FA complementation group C [Source:HGNC Symbol;Acc:HGNC:3584]
FARP2	FERM, ARH/RhoGEF and pleckstrin domain protein 2 [Source:HGNC Symbol;Acc:HGNC:16460]
FAS	Fas cell surface death receptor [Source:HGNC Symbol;Acc:HGNC:11920]
FASN	fatty acid synthase [Source:HGNC Symbol;Acc:HGNC:3594]
FAU	FAU ubiquitin like and ribosomal protein S30 fusion [Source:HGNC Symbol;Acc:HGNC:3597]
FBN1	fibrillin 1 [Source:HGNC Symbol;Acc:HGNC:3603]
FBXO38	F-box protein 38 [Source:NCBI gene;Acc:100722381]
FBXO7	F-box protein 7 [Source:HGNC Symbol;Acc:HGNC:13586]
FBXO9	F-box protein 9 [Source:HGNC Symbol;Acc:HGNC:13588]
FBXW7	F-box and WD repeat domain containing 7 [Source:HGNC Symbol;Acc:HGNC:16712]
FCER1G	Fc fragment of IgE receptor Ig [Source:HGNC Symbol;Acc:HGNC:3611]
FCRL1	Fc receptor like 1 [Source:HGNC Symbol;Acc:HGNC:18509]
FCRLB	Fc receptor like B [Source:HGNC Symbol;Acc:HGNC:26431]
FER	FER tyrosine kinase [Source:HGNC Symbol;Acc:HGNC:3655]
FFAR2	free fatty acid receptor 2 [Source:NCBI gene;Acc:100727294]
FGA	fibrinogen alpha chain [Source:HGNC Symbol;Acc:HGNC:3661]
FGB	fibrinogen beta chain [Source:HGNC Symbol;Acc:HGNC:3662]
FGF10	fibroblast growth factor 10 [Source:HGNC Symbol;Acc:HGNC:3666]
FGL2	fibrinogen like 2 [Source:HGNC Symbol;Acc:HGNC:3696]
FGR	FGR proto-oncogene, Src family tyrosine kinase [Source:HGNC Symbol;Acc:HGNC:3697]
FKBP1B	FKBP prolyl isomerase 1B [Source:HGNC Symbol;Acc:HGNC:3712]
FLI1	Fli-1 proto-oncogene, ETS transcription factor [Source:HGNC Symbol;Acc:HGNC:3749]
FLNB	filamin B [Source:HGNC Symbol;Acc:HGNC:3755]
FLT1	fms related tyrosine kinase 1 [Source:HGNC Symbol;Acc:HGNC:3763]
FLT3	fms related tyrosine kinase 3 [Source:NCBI gene;Acc:100732047]
FLT3LG	fms related tyrosine kinase 3 ligand [Source:HGNC Symbol;Acc:HGNC:3766]
FLVCR1	feline leukemia virus subgroup C cellular receptor 1 [Source:HGNC Symbol;Acc:HGNC:24682]
FNIP1	folliculin interacting protein 1 [Source:HGNC Symbol;Acc:HGNC:29418]
FOXF1	forkhead box F1 [Source:HGNC Symbol;Acc:HGNC:3809]
FOXJ1	forkhead box J1 [Source:HGNC Symbol;Acc:HGNC:3816]
FOXN1	forkhead box N1 [Source:NCBI gene;Acc:100726655]
FOXP3	forkhead box P3 [Source:HGNC Symbol;Acc:HGNC:6106]
FSHB	follicle stimulating hormone subunit beta [Source:HGNC Symbol;Acc:HGNC:3964]
FSHR	follicle stimulating hormone receptor [Source:HGNC Symbol;Acc:HGNC:3969]
FST	follistatin [Source:HGNC Symbol;Acc:HGNC:3971]
FSTL3	follistatin like 3 [Source:HGNC Symbol;Acc:HGNC:3973]
FUT4	fucosyltransferase 4 [Source:HGNC Symbol;Acc:HGNC:4015]
FUT7	fucosyltransferase 7 [Source:HGNC Symbol;Acc:HGNC:4018]
FUT9	fucosyltransferase 9 [Source:HGNC Symbol;Acc:HGNC:4020]
FYB1	FYN binding protein 1 [Source:HGNC Symbol;Acc:HGNC:4036]
FYB2	FYN binding protein 2 [Source:HGNC Symbol;Acc:HGNC:27295]
FYN	FYN proto-oncogene, Src family tyrosine kinase [Source:HGNC Symbol;Acc:HGNC:4037]
FZD7	frizzled class receptor 7 [Source:HGNC Symbol;Acc:HGNC:4045]
FZD9	frizzled class receptor 9 [Source:HGNC Symbol;Acc:HGNC:4047]
G3BP2	G3BP stress granule assembly factor 2 [Source:NCBI gene;Acc:100718027]
GAB2	GRB2 associated binding protein 2 [Source:HGNC Symbol;Acc:HGNC:14458]
GAB3	GRB2 associated binding protein 3 [Source:HGNC Symbol;Acc:HGNC:17515]
GABPA	GA binding protein transcription factor subunit alpha [Source:HGNC Symbol;Acc:HGNC:4071]
GAS6	growth arrest specific 6 [Source:HGNC Symbol;Acc:HGNC:4168]
GATA1	GATA binding protein 1 [Source:HGNC Symbol;Acc:HGNC:4170]
GATA2	GATA binding protein 2 [Source:HGNC Symbol;Acc:HGNC:4171]
GATA3	GATA binding protein 3 [Source:HGNC Symbol;Acc:HGNC:4172]
GATA6	GATA binding protein 6 [Source:HGNC Symbol;Acc:HGNC:4174]
GBA	glucosylceramidase beta [Source:HGNC Symbol;Acc:HGNC:4177]
GBP1	guanylate binding protein 1 [Source:HGNC Symbol;Acc:HGNC:4182]
GCH1	GTP cyclohydrolase 1 [Source:HGNC Symbol;Acc:HGNC:4193]
GCNT1	glucosaminyl (N-acetyl) transferase 1 [Source:HGNC Symbol;Acc:HGNC:4203]
GFI1	growth factor independent 1 transcriptional repressor [Source:HGNC Symbol;Acc:HGNC:4237]
Gja1	gap junction protein alpha 1 [Source:NCBI gene;Acc:100379273]
GLI3	GLI family zinc finger 3 [Source:NCBI gene;Acc:100719509]
GLMN	glomulin, FKBP associated protein [Source:HGNC Symbol;Acc:HGNC:14373]
GLO1	glyoxalase I [Source:HGNC Symbol;Acc:HGNC:4323]
GOLPH3	golgi phosphoprotein 3 [Source:HGNC Symbol;Acc:HGNC:15452]
GPAM	glycerol-3-phosphate acyltransferase, mitochondrial [Source:HGNC Symbol;Acc:HGNC:24865]
GPATCH3	G-patch domain containing 3 [Source:HGNC Symbol;Acc:HGNC:25720]
GPI	glucose-6-phosphate isomerase [Source:HGNC Symbol;Acc:HGNC:4458]
GPLD1	glycosylphosphatidylinositol specific phospholipase D1 [Source:HGNC Symbol;Acc:HGNC:4459]
GPR15	G protein-coupled receptor 15 [Source:HGNC Symbol;Acc:HGNC:4469]
GPR17	G protein-coupled receptor 17 [Source:HGNC Symbol;Acc:HGNC:4471]
GPR171	G protein-coupled receptor 171 [Source:HGNC Symbol;Acc:HGNC:30057]
GPR183	G protein-coupled receptor 183 [Source:HGNC Symbol;Acc:HGNC:3128]
GPR31	G protein-coupled receptor 31 [Source:HGNC Symbol;Acc:HGNC:4486]
GPR55	G protein-coupled receptor 55 [Source:NCBI gene;Acc:100726859]
GPR68	G protein-coupled receptor 68 [Source:HGNC Symbol;Acc:HGNC:4519]
GPS2	G protein pathway suppressor 2 [Source:HGNC Symbol;Acc:HGNC:4550]
GRN	Progranulin Paragranulin Granulin-1 Granulin-2 Granulin-3 Granulin-4 Granulin-5 Granulin-6 Granulin-7 [Source:UniProtKB/Swiss-Prot;Acc:P28797]
GSN	gelsolin [Source:NCBI gene;Acc:100722590]
H2BC21	H2B clustered histone 21 [Source:HGNC Symbol;Acc:HGNC:4760]
H4-16	H4 histone 16 [Source:HGNC Symbol;Acc:HGNC:20510]
H4C11	H4 clustered histone 11 [Source:HGNC Symbol;Acc:HGNC:4785]
H4C15	H4 clustered histone 15 [Source:HGNC Symbol;Acc:HGNC:29607]
H4C8	H4 clustered histone 8 [Source:HGNC Symbol;Acc:HGNC:4788]
HAMP	hepcidin antimicrobial peptide [Source:HGNC Symbol;Acc:HGNC:15598]
HAND2	heart and neural crest derivatives expressed 2 [Source:HGNC Symbol;Acc:HGNC:4808]
HAX1	HCLS1 associated protein X-1 [Source:HGNC Symbol;Acc:HGNC:16915]
HCLS1	hematopoietic cell-specific Lyn substrate 1 [Source:HGNC Symbol;Acc:HGNC:4844]
HEATR9	HEAT repeat containing 9 [Source:HGNC Symbol;Acc:HGNC:26548]
HECTD1	HECT domain E3 ubiquitin protein ligase 1 [Source:HGNC Symbol;Acc:HGNC:20157]
HELLS	helicase, lymphoid specific [Source:HGNC Symbol;Acc:HGNC:4861]
HES1	hes family bHLH transcription factor 1 [Source:HGNC Symbol;Acc:HGNC:5192]
HFE	homeostatic iron regulator [Source:HGNC Symbol;Acc:HGNC:4886]
HIF1A	hypoxia inducible factor 1 subunit alpha [Source:HGNC Symbol;Acc:HGNC:4910]
HK1	hexokinase 1 [Source:HGNC Symbol;Acc:HGNC:4922]
HLA-DMA	major histocompatibility complex, class II, DM alpha [Source:HGNC Symbol;Acc:HGNC:4934]
HLA-DOA	major histocompatibility complex, class II, DO alpha [Source:HGNC Symbol;Acc:HGNC:4936]
HLA-DOB	major histocompatibility complex, class II, DO beta [Source:HGNC Symbol;Acc:HGNC:4937]
HLA-DQB2	major histocompatibility complex, class II, DQ beta 1 [Source:HGNC Symbol;Acc:HGNC:4944]
HLA-DRA	major histocompatibility complex, class II, DR alpha [Source:HGNC Symbol;Acc:HGNC:4947]
HLX	H2.0 like homeobox [Source:HGNC Symbol;Acc:HGNC:4978]
HMOX1	heme oxygenase 1 [Source:HGNC Symbol;Acc:HGNC:5013]
HOXA3	homeobox A3 [Source:HGNC Symbol;Acc:HGNC:5104]
HOXA5	homeobox A5 [Source:HGNC Symbol;Acc:HGNC:5106]
HOXA9	homeobox A9 [Source:HGNC Symbol;Acc:HGNC:5109]
HOXB6	homeobox B6 [Source:HGNC Symbol;Acc:HGNC:5117]
HPRT1	hypoxanthine phosphoribosyltransferase 1 [Source:HGNC Symbol;Acc:HGNC:5157]
HPX	hemopexin [Source:HGNC Symbol;Acc:HGNC:5171]
HRAS	HRas proto-oncogene, GTPase [Source:HGNC Symbol;Acc:HGNC:5173]
HRG	histidine rich glycoprotein [Source:HGNC Symbol;Acc:HGNC:5181]
HRH1	histamine receptor H1 [Source:HGNC Symbol;Acc:HGNC:5182]
HSD3B7	hydroxy-delta-5-steroid dehydrogenase, 3 beta- and steroid delta-isomerase 7 [Source:HGNC Symbol;Acc:HGNC:18324]
HSP90AA1	heat shock protein 90 alpha family class A member 1 [Source:HGNC Symbol;Acc:HGNC:5253]
HSP90AB1	heat shock protein 90 alpha family class B member 1 [Source:HGNC Symbol;Acc:HGNC:5258]
HSPA9	heat shock protein family A (Hsp70) member 9 [Source:HGNC Symbol;Acc:HGNC:5244]
HSPD1	heat shock protein family D (Hsp60) member 1 [Source:HGNC Symbol;Acc:HGNC:5261]
HYAL2	hyaluronidase 2 [Source:HGNC Symbol;Acc:HGNC:5321]
ICOS	inducible T cell costimulator [Source:HGNC Symbol;Acc:HGNC:5351]
IDE	insulin degrading enzyme [Source:HGNC Symbol;Acc:HGNC:5381]
Ifi30	IFI30 lysosomal thiol reductase [Source:NCBI gene;Acc:100715862]
IFI35	interferon induced protein 35 [Source:HGNC Symbol;Acc:HGNC:5399]
IFIH1	interferon induced with helicase C domain 1 [Source:HGNC Symbol;Acc:HGNC:18873]
IFIT1B	interferon induced protein with tetratricopeptide repeats 1B [Source:HGNC Symbol;Acc:HGNC:23442]
IFIT5	interferon induced protein with tetratricopeptide repeats 5 [Source:HGNC Symbol;Acc:HGNC:13328]
IFNAR1	interferon alpha and beta receptor subunit 1 [Source:HGNC Symbol;Acc:HGNC:5432]
IFNG	interferon gamma [Source:HGNC Symbol;Acc:HGNC:5438]
IFNGR2	interferon gamma receptor 2 [Source:HGNC Symbol;Acc:HGNC:5440]
IFNLR1	interferon lambda receptor 1 [Source:HGNC Symbol;Acc:HGNC:18584]
IGF1	insulin like growth factor 1 [Source:HGNC Symbol;Acc:HGNC:5464]
IGF2	insulin like growth factor 2 [Source:HGNC Symbol;Acc:HGNC:5466]
IGFBP2	insulin like growth factor binding protein 2 [Source:HGNC Symbol;Acc:HGNC:5471]
IHH	Indian hedgehog signaling molecule [Source:HGNC Symbol;Acc:HGNC:5956]
IKBKE	inhibitor of nuclear factor kappa B kinase subunit epsilon [Source:NCBI gene;Acc:100716187]
IKZF1	IKAROS family zinc finger 1 [Source:HGNC Symbol;Acc:HGNC:13176]
IKZF3	IKAROS family zinc finger 3 [Source:HGNC Symbol;Acc:HGNC:13178]
IL10	interleukin 10 [Source:HGNC Symbol;Acc:HGNC:5962]
Il12a	interleukin 12A [Source:NCBI gene;Acc:100379543]
IL12B	Interleukin-12 subunit beta [Source:UniProtKB/Swiss-Prot;Acc:Q924V5]
IL12RB1	interleukin 12 receptor subunit beta 1 [Source:HGNC Symbol;Acc:HGNC:5971]
IL13	interleukin 13 [Source:HGNC Symbol;Acc:HGNC:5973]
IL13RA2	interleukin 13 receptor subunit alpha 2 [Source:HGNC Symbol;Acc:HGNC:5975]
IL15	Interleukin-15 [Source:UniProtKB/Swiss-Prot;Acc:Q75SZ9]
IL16	interleukin 16 [Source:HGNC Symbol;Acc:HGNC:5980]
IL17A	interleukin 17A [Source:HGNC Symbol;Acc:HGNC:5981]
IL17D	interleukin 17D [Source:HGNC Symbol;Acc:HGNC:5984]
IL17RA	interleukin 17 receptor A [Source:HGNC Symbol;Acc:HGNC:5985]
IL17RC	interleukin 17 receptor C [Source:HGNC Symbol;Acc:HGNC:18358]
IL18	interleukin 18 [Source:HGNC Symbol;Acc:HGNC:5986]
IL18R1	interleukin 18 receptor 1 [Source:HGNC Symbol;Acc:HGNC:5988]
IL18RAP	interleukin 18 receptor accessory protein [Source:HGNC Symbol;Acc:HGNC:5989]
IL1A	interleukin 1 alpha [Source:HGNC Symbol;Acc:HGNC:5991]
IL1B	Interleukin-1 beta [Source:UniProtKB/Swiss-Prot;Acc:Q9WVG1]
IL1F10	interleukin 1 family member 10 [Source:NCBI gene;Acc:100722140]
IL1R1	interleukin 1 receptor type 1 [Source:HGNC Symbol;Acc:HGNC:5993]
IL1RL1	interleukin 1 receptor like 1 [Source:HGNC Symbol;Acc:HGNC:5998]
IL1RL2	interleukin 1 receptor like 2 [Source:HGNC Symbol;Acc:HGNC:5999]
IL1RN	interleukin 1 receptor antagonist [Source:HGNC Symbol;Acc:HGNC:6000]
IL2	interleukin 2 [Source:HGNC Symbol;Acc:HGNC:6001]
IL20	interleukin 20 [Source:HGNC Symbol;Acc:HGNC:6002]
IL21	interleukin 21 [Source:HGNC Symbol;Acc:HGNC:6005]
IL23A	Interleukin-23 subunit alpha [Source:UniProtKB/Swiss-Prot;Acc:Q6LA37]
IL25	interleukin 25 [Source:HGNC Symbol;Acc:HGNC:13765]
IL27	interleukin 27 [Source:NCBI gene;Acc:100724612]
IL27RA	interleukin 27 receptor subunit alpha [Source:HGNC Symbol;Acc:HGNC:17290]
IL2RA	interleukin 2 receptor subunit alpha [Source:HGNC Symbol;Acc:HGNC:6008]
IL31RA	interleukin 31 receptor A [Source:NCBI gene;Acc:100724300]
IL33	interleukin 33 [Source:HGNC Symbol;Acc:HGNC:16028]
IL34	interleukin 34 [Source:HGNC Symbol;Acc:HGNC:28529]
IL36RN	interleukin 36 receptor antagonist [Source:HGNC Symbol;Acc:HGNC:15561]
IL5	Interleukin-5 [Source:UniProtKB/Swiss-Prot;Acc:O08987]
Il5ra	interleukin 5 receptor subunit alpha [Source:NCBI gene;Acc:100379257]
IL6ST	interleukin 6 signal transducer [Source:HGNC Symbol;Acc:HGNC:6021]
IL7	interleukin 7 [Source:HGNC Symbol;Acc:HGNC:6023]
ILF3	interleukin enhancer binding factor 3 [Source:HGNC Symbol;Acc:HGNC:6038]
ILRUN	inflammation and lipid regulator with UBA-like and NBR1-like domains [Source:HGNC Symbol;Acc:HGNC:21215]
IMPDH2	inosine monophosphate dehydrogenase 2 [Source:HGNC Symbol;Acc:HGNC:6053]
INAVA	innate immunity activator [Source:HGNC Symbol;Acc:HGNC:25599]
INPP5D	inositol polyphosphate-5-phosphatase D [Source:HGNC Symbol;Acc:HGNC:6079]
INPPL1	inositol polyphosphate phosphatase like 1 [Source:HGNC Symbol;Acc:HGNC:6080]
INS	Insulin Insulin B chain Insulin A chain [Source:UniProtKB/Swiss-Prot;Acc:P01329]
IPO7	importin 7 [Source:HGNC Symbol;Acc:HGNC:9852]
IRAK1	interleukin 1 receptor associated kinase 1 [Source:HGNC Symbol;Acc:HGNC:6112]
IRAK3	interleukin 1 receptor associated kinase 3 [Source:HGNC Symbol;Acc:HGNC:17020]
IRAK4	interleukin 1 receptor associated kinase 4 [Source:HGNC Symbol;Acc:HGNC:17967]
IREB2	iron responsive element binding protein 2 [Source:HGNC Symbol;Acc:HGNC:6115]
IRF1	interferon regulatory factor 1 [Source:HGNC Symbol;Acc:HGNC:6116]
IRF2	interferon regulatory factor 2 [Source:HGNC Symbol;Acc:HGNC:6117]
IRF4	interferon regulatory factor 4 [Source:NCBI gene;Acc:100719564]
IRF5	interferon regulatory factor 5 [Source:HGNC Symbol;Acc:HGNC:6120]
IRF7	interferon regulatory factor 7 [Source:HGNC Symbol;Acc:HGNC:6122]
ISG15	ISG15 ubiquitin like modifier [Source:HGNC Symbol;Acc:HGNC:4053]
ITCH	itchy E3 ubiquitin protein ligase [Source:HGNC Symbol;Acc:HGNC:13890]
ITFG2	integrin alpha FG-GAP repeat containing 2 [Source:HGNC Symbol;Acc:HGNC:30879]
ITGA1	integrin subunit alpha 1 [Source:HGNC Symbol;Acc:HGNC:6134]
ITGA9	integrin subunit alpha 9 [Source:HGNC Symbol;Acc:HGNC:6145]
ITGAL	integrin subunit alpha L [Source:HGNC Symbol;Acc:HGNC:6148]
ITGAM	integrin subunit alpha M [Source:HGNC Symbol;Acc:HGNC:6149]
ITGB2	integrin subunit beta 2 [Source:HGNC Symbol;Acc:HGNC:6155]
ITGB6	integrin subunit beta 6 [Source:HGNC Symbol;Acc:HGNC:6161]
ITGB7	integrin subunit beta 7 [Source:HGNC Symbol;Acc:HGNC:6162]
ITGB8	integrin subunit beta 8 [Source:HGNC Symbol;Acc:HGNC:6163]
ITK	IL2 inducible T cell kinase [Source:HGNC Symbol;Acc:HGNC:6171]
ITPKB	inositol-trisphosphate 3-kinase B [Source:HGNC Symbol;Acc:HGNC:6179]
JAG1	jagged canonical Notch ligand 1 [Source:HGNC Symbol;Acc:HGNC:6188]
JAG2	jagged canonical Notch ligand 2 [Source:HGNC Symbol;Acc:HGNC:6189]
JAGN1	jagunal homolog 1 [Source:HGNC Symbol;Acc:HGNC:26926]
JAM2	junctional adhesion molecule 2 [Source:HGNC Symbol;Acc:HGNC:14686]
JAM3	junctional adhesion molecule 3 [Source:HGNC Symbol;Acc:HGNC:15532]
JARID2	jumonji and AT-rich interaction domain containing 2 [Source:HGNC Symbol;Acc:HGNC:6196]
Jchain	joining chain of multimeric IgA and IgM [Source:NCBI gene;Acc:100716442]
JMJD6	jumonji domain containing 6, arginine demethylase and lysine hydroxylase [Source:HGNC Symbol;Acc:HGNC:19355]
JUN	Jun proto-oncogene, AP-1 transcription factor subunit [Source:HGNC Symbol;Acc:HGNC:6204]
JUNB	JunB proto-oncogene, AP-1 transcription factor subunit [Source:HGNC Symbol;Acc:HGNC:6205]
KARS1	lysyl-tRNA synthetase 1 [Source:HGNC Symbol;Acc:HGNC:6215]
KAT2A	lysine acetyltransferase 2A [Source:HGNC Symbol;Acc:HGNC:4201]
KAT7	lysine acetyltransferase 7 [Source:HGNC Symbol;Acc:HGNC:17016]
KAT8	lysine acetyltransferase 8 [Source:HGNC Symbol;Acc:HGNC:17933]
KCNJ8	potassium inwardly rectifying channel subfamily J member 8 [Source:HGNC Symbol;Acc:HGNC:6269]
KCNN4	potassium calcium-activated channel subfamily N member 4 [Source:HGNC Symbol;Acc:HGNC:6293]
KCP	kielin cysteine rich BMP regulator [Source:HGNC Symbol;Acc:HGNC:17585]
KDELR1	KDEL endoplasmic reticulum protein retention receptor 1 [Source:HGNC Symbol;Acc:HGNC:6304]
KHDRBS1	KH RNA binding domain containing, signal transduction associated 1 [Source:HGNC Symbol;Acc:HGNC:18116]
KIF5B	kinesin family member 5B [Source:HGNC Symbol;Acc:HGNC:6324]
KIRREL3	kirre like nephrin family adhesion molecule 3 [Source:HGNC Symbol;Acc:HGNC:23204]
KIT	KIT proto-oncogene, receptor tyrosine kinase [Source:HGNC Symbol;Acc:HGNC:6342]
KITLG	KIT ligand [Source:HGNC Symbol;Acc:HGNC:6343]
KLF10	Kruppel like factor 10 [Source:HGNC Symbol;Acc:HGNC:11810]
KLHL6	kelch like family member 6 [Source:HGNC Symbol;Acc:HGNC:18653]
KLK7	kallikrein related peptidase 7 [Source:HGNC Symbol;Acc:HGNC:6368]
KLRD1	killer cell lectin like receptor D1 [Source:HGNC Symbol;Acc:HGNC:6378]
KMT5B	lysine methyltransferase 5B [Source:HGNC Symbol;Acc:HGNC:24283]
KMT5C	lysine methyltransferase 5C [Source:HGNC Symbol;Acc:HGNC:28405]
KRT1	keratin 1 [Source:HGNC Symbol;Acc:HGNC:6412]
KRT75	keratin 75 [Source:HGNC Symbol;Acc:HGNC:24431]
KYNU	kynureninase [Source:HGNC Symbol;Acc:HGNC:6469]
L3MBTL3	L3MBTL histone methyl-lysine binding protein 3 [Source:HGNC Symbol;Acc:HGNC:23035]
LAG3	lymphocyte activating 3 [Source:HGNC Symbol;Acc:HGNC:6476]
LAMP1	lysosomal associated membrane protein 1 [Source:HGNC Symbol;Acc:HGNC:6499]
LAT	linker for activation of T cells [Source:HGNC Symbol;Acc:HGNC:18874]
LAT2	linker for activation of T cells family member 2 [Source:HGNC Symbol;Acc:HGNC:12749]
LAX1	lymphocyte transmembrane adaptor 1 [Source:HGNC Symbol;Acc:HGNC:26005]
LBP	lipopolysaccharide binding protein [Source:HGNC Symbol;Acc:HGNC:6517]
LCK	LCK proto-oncogene, Src family tyrosine kinase [Source:HGNC Symbol;Acc:HGNC:6524]
LCP2	lymphocyte cytosolic protein 2 [Source:HGNC Symbol;Acc:HGNC:6529]
LDB1	LIM domain binding 1 [Source:HGNC Symbol;Acc:HGNC:6532]
LDLR	low density lipoprotein receptor [Source:HGNC Symbol;Acc:HGNC:6547]
LEF1	lymphoid enhancer binding factor 1 [Source:HGNC Symbol;Acc:HGNC:6551]
LEO1	LEO1 homolog, Paf1/RNA polymerase II complex component [Source:HGNC Symbol;Acc:HGNC:30401]
LEP	leptin [Source:HGNC Symbol;Acc:HGNC:6553]
LEPR	leptin receptor [Source:HGNC Symbol;Acc:HGNC:6554]
LGALS1	galectin 1 [Source:HGNC Symbol;Acc:HGNC:6561]
LGALS3	galectin 3 [Source:HGNC Symbol;Acc:HGNC:6563]
LGMN	legumain [Source:HGNC Symbol;Acc:HGNC:9472]
LIF	LIF interleukin 6 family cytokine [Source:NCBI gene;Acc:100713602]
LIG4	DNA ligase 4 [Source:HGNC Symbol;Acc:HGNC:6601]
LMBR1L	limb development membrane protein 1 like [Source:HGNC Symbol;Acc:HGNC:18268]
LMO1	LIM domain only 1 [Source:HGNC Symbol;Acc:HGNC:6641]
LMO4	LIM domain only 4 [Source:HGNC Symbol;Acc:HGNC:6644]
LPXN	leupaxin [Source:HGNC Symbol;Acc:HGNC:14061]
LRCH1	leucine rich repeats and calponin homology domain containing 1 [Source:HGNC Symbol;Acc:HGNC:20309]
LRFN5	leucine rich repeat and fibronectin type III domain containing 5 [Source:HGNC Symbol;Acc:HGNC:20360]
LRP5	LDL receptor related protein 5 [Source:HGNC Symbol;Acc:HGNC:6697]
LRP8	LDL receptor related protein 8 [Source:HGNC Symbol;Acc:HGNC:6700]
LRRC32	leucine rich repeat containing 32 [Source:HGNC Symbol;Acc:HGNC:4161]
LRRK1	leucine rich repeat kinase 1 [Source:HGNC Symbol;Acc:HGNC:18608]
LSM14A	LSM14A mRNA processing body assembly factor [Source:HGNC Symbol;Acc:HGNC:24489]
LTA	lymphotoxin alpha [Source:HGNC Symbol;Acc:HGNC:6709]
LTB	lymphotoxin beta [Source:HGNC Symbol;Acc:HGNC:6711]
LTBR	lymphotoxin beta receptor [Source:HGNC Symbol;Acc:HGNC:6718]
LTF	lactotransferrin [Source:HGNC Symbol;Acc:HGNC:6720]
LY6D	lymphocyte antigen 6 family member D [Source:HGNC Symbol;Acc:HGNC:13348]
LY86	lymphocyte antigen 86 [Source:HGNC Symbol;Acc:HGNC:16837]
LY96	lymphocyte antigen 96 [Source:HGNC Symbol;Acc:HGNC:17156]
LYL1	LYL1 basic helix-loop-helix family member [Source:HGNC Symbol;Acc:HGNC:6734]
LYN	LYN proto-oncogene, Src family tyrosine kinase [Source:HGNC Symbol;Acc:HGNC:6735]
LYST	lysosomal trafficking regulator [Source:HGNC Symbol;Acc:HGNC:1968]
MAD1L1	mitotic arrest deficient 1 like 1 [Source:HGNC Symbol;Acc:HGNC:6762]
MAEA	macrophage erythroblast attacher [Source:NCBI gene;Acc:100719481]
MAFB	MAF bZIP transcription factor B [Source:HGNC Symbol;Acc:HGNC:6408]
MALT1	MALT1 paracaspase [Source:HGNC Symbol;Acc:HGNC:6819]
MAP2K1	mitogen-activated protein kinase kinase 1 [Source:HGNC Symbol;Acc:HGNC:6840]
MAP3K14	mitogen-activated protein kinase kinase kinase 14 [Source:HGNC Symbol;Acc:HGNC:6853]
MAP3K7	mitogen-activated protein kinase kinase kinase 7 [Source:HGNC Symbol;Acc:HGNC:6859]
MAPK1	mitogen-activated protein kinase 1 [Source:HGNC Symbol;Acc:HGNC:6871]
MAPK14	mitogen-activated protein kinase 14 [Source:HGNC Symbol;Acc:HGNC:6876]
MAPK3	mitogen-activated protein kinase 3 [Source:HGNC Symbol;Acc:HGNC:6877]
MAPK8IP1	mitogen-activated protein kinase 8 interacting protein 1 [Source:HGNC Symbol;Acc:HGNC:6882]
MARCHF7	membrane associated ring-CH-type finger 7 [Source:HGNC Symbol;Acc:HGNC:17393]
MASP1	mannan binding lectin serine peptidase 1 [Source:HGNC Symbol;Acc:HGNC:6901]
MAVS	mitochondrial antiviral signaling protein [Source:HGNC Symbol;Acc:HGNC:29233]
MB	myoglobin [Source:HGNC Symbol;Acc:HGNC:6915]
MBL2	mannose binding lectin 2 [Source:HGNC Symbol;Acc:HGNC:6922]
MCM3AP	minichromosome maintenance complex component 3 associated protein [Source:HGNC Symbol;Acc:HGNC:6946]
MCOLN2	mucolipin 2 [Source:HGNC Symbol;Acc:HGNC:13357]
MCU	mitochondrial calcium uniporter [Source:HGNC Symbol;Acc:HGNC:23526]
MED1	mediator complex subunit 1 [Source:NCBI gene;Acc:100722971]
MEIS1	Meis homeobox 1 [Source:HGNC Symbol;Acc:HGNC:7000]
MEIS2	Meis homeobox 2 [Source:HGNC Symbol;Acc:HGNC:7001]
MERTK	MER proto-oncogene, tyrosine kinase [Source:HGNC Symbol;Acc:HGNC:7027]
METTL3	methyltransferase like 3 [Source:HGNC Symbol;Acc:HGNC:17563]
MFHAS1	malignant fibrous histiocytoma amplified sequence 1 [Source:HGNC Symbol;Acc:HGNC:16982]
MFNG	MFNG O-fucosylpeptide 3-beta-N-acetylglucosaminyltransferase [Source:HGNC Symbol;Acc:HGNC:7038]
MID2	midline 2 [Source:HGNC Symbol;Acc:HGNC:7096]
MIF	macrophage migration inhibitory factor [Source:HGNC Symbol;Acc:HGNC:7097]
MKNK2	MAPK interacting serine/threonine kinase 2 [Source:HGNC Symbol;Acc:HGNC:7111]
MLH1	mutL homolog 1 [Source:HGNC Symbol;Acc:HGNC:7127]
MLKL	mixed lineage kinase domain like pseudokinase [Source:HGNC Symbol;Acc:HGNC:26617]
MMP12	matrix metallopeptidase 12 [Source:HGNC Symbol;Acc:HGNC:7158]
MMP14	matrix metallopeptidase 14 [Source:HGNC Symbol;Acc:HGNC:7160]
MMP21	matrix metallopeptidase 21 [Source:HGNC Symbol;Acc:HGNC:14357]
MMP28	matrix metallopeptidase 28 [Source:HGNC Symbol;Acc:HGNC:14366]
MMP8	matrix metallopeptidase 8 [Source:HGNC Symbol;Acc:HGNC:7175]
MOSPD2	motile sperm domain containing 2 [Source:HGNC Symbol;Acc:HGNC:28381]
MOV10	Mov10 RISC complex RNA helicase [Source:HGNC Symbol;Acc:HGNC:7200]
MPIG6B	megakaryocyte and platelet inhibitory receptor G6b [Source:HGNC Symbol;Acc:HGNC:13937]
MPP1	membrane palmitoylated protein 1 [Source:HGNC Symbol;Acc:HGNC:7219]
MR1	major histocompatibility complex, class I-related [Source:HGNC Symbol;Acc:HGNC:4975]
MRC1	mannose receptor C-type 1 [Source:HGNC Symbol;Acc:HGNC:7228]
MSH2	mutS homolog 2 [Source:HGNC Symbol;Acc:HGNC:7325]
MSH6	mutS homolog 6 [Source:HGNC Symbol;Acc:HGNC:7329]
MSMP	microseminoprotein, prostate associated [Source:HGNC Symbol;Acc:HGNC:29663]
MSN	moesin [Source:HGNC Symbol;Acc:HGNC:7373]
MSTN	myostatin [Source:HGNC Symbol;Acc:HGNC:4223]
MTHFD1	methylenetetrahydrofolate dehydrogenase, cyclohydrolase and formyltetrahydrofolate synthetase 1 [Source:HGNC Symbol;Acc:HGNC:7432]
MTOR	mechanistic target of rapamycin kinase [Source:HGNC Symbol;Acc:HGNC:3942]
MTURN	maturin, neural progenitor differentiation regulator homolog [Source:HGNC Symbol;Acc:HGNC:25457]
MUL1	mitochondrial E3 ubiquitin protein ligase 1 [Source:HGNC Symbol;Acc:HGNC:25762]
MYB	MYB proto-oncogene, transcription factor [Source:HGNC Symbol;Acc:HGNC:7545]
MYD88	MYD88 innate immune signal transduction adaptor [Source:HGNC Symbol;Acc:HGNC:7562]
MYH9	myosin heavy chain 9 [Source:HGNC Symbol;Acc:HGNC:7579]
MYO18A	myosin XVIIIA [Source:NCBI gene;Acc:100720062]
MYO1C	myosin IC [Source:HGNC Symbol;Acc:HGNC:7597]
MYO1E	myosin IE [Source:HGNC Symbol;Acc:HGNC:7599]
MYO1G	myosin IG [Source:HGNC Symbol;Acc:HGNC:13880]
MYSM1	Myb like, SWIRM and MPN domains 1 [Source:HGNC Symbol;Acc:HGNC:29401]
MZB1	marginal zone B and B1 cell specific protein [Source:HGNC Symbol;Acc:HGNC:30125]
NBEAL2	neurobeachin like 2 [Source:HGNC Symbol;Acc:HGNC:31928]
NBL1	NBL1, DAN family BMP antagonist [Source:HGNC Symbol;Acc:HGNC:7650]
NBN	nibrin [Source:HGNC Symbol;Acc:HGNC:7652]
NCAPH2	non-SMC condensin II complex subunit H2 [Source:HGNC Symbol;Acc:HGNC:25071]
NCBP3	nuclear cap binding subunit 3 [Source:HGNC Symbol;Acc:HGNC:24612]
NCK1	NCK adaptor protein 1 [Source:HGNC Symbol;Acc:HGNC:7664]
NCK2	NCK adaptor protein 2 [Source:HGNC Symbol;Acc:HGNC:7665]
NCKAP1L	NCK associated protein 1 like [Source:HGNC Symbol;Acc:HGNC:4862]
NCOA6	nuclear receptor coactivator 6 [Source:HGNC Symbol;Acc:HGNC:15936]
NCSTN	nicastrin [Source:HGNC Symbol;Acc:HGNC:17091]
NDFIP1	Nedd4 family interacting protein 1 [Source:HGNC Symbol;Acc:HGNC:17592]
NDRG1	N-myc downstream regulated 1 [Source:HGNC Symbol;Acc:HGNC:7679]
NECTIN2	nectin cell adhesion molecule 2 [Source:HGNC Symbol;Acc:HGNC:9707]
NF1	neurofibromin 1 [Source:HGNC Symbol;Acc:HGNC:7765]
NFAM1	NFAT activating protein with ITAM motif 1 [Source:HGNC Symbol;Acc:HGNC:29872]
NFATC2	nuclear factor of activated T cells 2 [Source:HGNC Symbol;Acc:HGNC:7776]
NFE2L2	nuclear factor, erythroid 2 like 2 [Source:HGNC Symbol;Acc:HGNC:7782]
NFKB2	nuclear factor kappa B subunit 2 [Source:HGNC Symbol;Acc:HGNC:7795]
NFKBIA	NFKB inhibitor alpha [Source:HGNC Symbol;Acc:HGNC:7797]
NFKBIZ	NFKB inhibitor zeta [Source:HGNC Symbol;Acc:HGNC:29805]
NHEJ1	non-homologous end joining factor 1 [Source:HGNC Symbol;Acc:HGNC:25737]
NKX2-3	NK2 homeobox 3 [Source:HGNC Symbol;Acc:HGNC:7836]
NKX2-5	NK2 homeobox 5 [Source:HGNC Symbol;Acc:HGNC:2488]
NKX3-2	NK3 homeobox 2 [Source:HGNC Symbol;Acc:HGNC:951]
NLRX1	NLR family member X1 [Source:HGNC Symbol;Acc:HGNC:29890]
NMI	N-myc and STAT interactor [Source:HGNC Symbol;Acc:HGNC:7854]
NOD1	nucleotide binding oligomerization domain containing 1 [Source:HGNC Symbol;Acc:HGNC:16390]
NOD2	nucleotide binding oligomerization domain containing 2 [Source:HGNC Symbol;Acc:HGNC:5331]
NOP53	NOP53 ribosome biogenesis factor [Source:HGNC Symbol;Acc:HGNC:4333]
NOS2	nitric oxide synthase 2 [Source:NCBI gene;Acc:100135576]
NOTCH1	notch receptor 1 [Source:HGNC Symbol;Acc:HGNC:7881]
NOTCH2	notch receptor 2 [Source:HGNC Symbol;Acc:HGNC:7882]
NPLOC4	NPL4 homolog, ubiquitin recognition factor [Source:HGNC Symbol;Acc:HGNC:18261]
NR1D1	nuclear receptor subfamily 1 group D member 1 [Source:HGNC Symbol;Acc:HGNC:7962]
NRROS	negative regulator of reactive oxygen species [Source:HGNC Symbol;Acc:HGNC:24613]
NSD2	nuclear receptor binding SET domain protein 2 [Source:HGNC Symbol;Acc:HGNC:12766]
NTRK1	neurotrophic receptor tyrosine kinase 1 [Source:HGNC Symbol;Acc:HGNC:8031]
NUB1	negative regulator of ubiquitin like proteins 1 [Source:HGNC Symbol;Acc:HGNC:17623]
NUDT21	nudix hydrolase 21 [Source:HGNC Symbol;Acc:HGNC:13870]
OAS1	2'-5'-oligoadenylate synthetase 1 [Source:HGNC Symbol;Acc:HGNC:8086]
OAS2	2'-5'-oligoadenylate synthetase 2 [Source:HGNC Symbol;Acc:HGNC:8087]
OAS3	2'-5'-oligoadenylate synthetase 3 [Source:HGNC Symbol;Acc:HGNC:8088]
OCSTAMP	osteoclast stimulatory transmembrane protein [Source:HGNC Symbol;Acc:HGNC:16116]
ONECUT1	one cut homeobox 1 [Source:HGNC Symbol;Acc:HGNC:8138]
OSTM1	osteoclastogenesis associated transmembrane protein 1 [Source:HGNC Symbol;Acc:HGNC:21652]
OTOP1	otopetrin 1 [Source:HGNC Symbol;Acc:HGNC:19656]
OTUD7B	OTU deubiquitinase 7B [Source:HGNC Symbol;Acc:HGNC:16683]
OTULIN	OTU deubiquitinase with linear linkage specificity [Source:HGNC Symbol;Acc:HGNC:25118]
OXSR1	oxidative stress responsive kinase 1 [Source:HGNC Symbol;Acc:HGNC:8508]
P2rx7	purinergic receptor P2X 7 [Source:NCBI gene;Acc:100379234]
PABPC4	poly(A) binding protein cytoplasmic 4 [Source:HGNC Symbol;Acc:HGNC:8557]
PADI2	peptidyl arginine deiminase 2 [Source:HGNC Symbol;Acc:HGNC:18341]
PAFAH1B1	platelet activating factor acetylhydrolase 1b regulatory subunit 1 [Source:HGNC Symbol;Acc:HGNC:8574]
PAG1	phosphoprotein membrane anchor with glycosphingolipid microdomains 1 [Source:HGNC Symbol;Acc:HGNC:30043]
PARK7	Parkinsonism associated deglycase [Source:HGNC Symbol;Acc:HGNC:16369]
PARP14	poly(ADP-ribose) polymerase family member 14 [Source:HGNC Symbol;Acc:HGNC:29232]
PARP3	poly(ADP-ribose) polymerase family member 3 [Source:HGNC Symbol;Acc:HGNC:273]
PATZ1	POZ/BTB and AT hook containing zinc finger 1 [Source:HGNC Symbol;Acc:HGNC:13071]
PAWR	pro-apoptotic WT1 regulator [Source:HGNC Symbol;Acc:HGNC:8614]
PAX1	paired box 1 [Source:HGNC Symbol;Acc:HGNC:8615]
PAXIP1	PAX interacting protein 1 [Source:HGNC Symbol;Acc:HGNC:8624]
PBX1	PBX homeobox 1 [Source:HGNC Symbol;Acc:HGNC:8632]
PCBP2	poly(rC) binding protein 2 [Source:HGNC Symbol;Acc:HGNC:8648]
PCID2	PCI domain containing 2 [Source:HGNC Symbol;Acc:HGNC:25653]
PCK1	phosphoenolpyruvate carboxykinase 1 [Source:HGNC Symbol;Acc:HGNC:8724]
PDCD1	programmed cell death 1 [Source:HGNC Symbol;Acc:HGNC:8760]
PDE12	phosphodiesterase 12 [Source:HGNC Symbol;Acc:HGNC:25386]
PDE1B	phosphodiesterase 1B [Source:HGNC Symbol;Acc:HGNC:8775]
PDE4B	phosphodiesterase 4B [Source:HGNC Symbol;Acc:HGNC:8781]
PDE4D	phosphodiesterase 4D [Source:HGNC Symbol;Acc:HGNC:8783]
PDE5A	phosphodiesterase 5A [Source:HGNC Symbol;Acc:HGNC:8784]
PDGFB	platelet derived growth factor subunit B [Source:HGNC Symbol;Acc:HGNC:8800]
PDGFRA	platelet derived growth factor receptor alpha [Source:HGNC Symbol;Acc:HGNC:8803]
PDPK1	3-phosphoinositide dependent protein kinase 1 [Source:HGNC Symbol;Acc:HGNC:8816]
PECAM1	platelet and endothelial cell adhesion molecule 1 [Source:HGNC Symbol;Acc:HGNC:8823]
PELI1	pellino E3 ubiquitin protein ligase 1 [Source:NCBI gene;Acc:100730342]
Pgc	progastricsin [Source:NCBI gene;Acc:100135598]
PGLYRP1	peptidoglycan recognition protein 1 [Source:HGNC Symbol;Acc:HGNC:8904]
PGLYRP2	peptidoglycan recognition protein 2 [Source:HGNC Symbol;Acc:HGNC:30013]
PGLYRP3	peptidoglycan recognition protein 3 [Source:HGNC Symbol;Acc:HGNC:30014]
PGM3	phosphoglucomutase 3 [Source:HGNC Symbol;Acc:HGNC:8907]
PHB	prohibitin [Source:HGNC Symbol;Acc:HGNC:8912]
PHB2	prohibitin 2 [Source:HGNC Symbol;Acc:HGNC:30306]
PHLPP1	PH domain and leucine rich repeat protein phosphatase 1 [Source:HGNC Symbol;Acc:HGNC:20610]
PHPT1	phosphohistidine phosphatase 1 [Source:HGNC Symbol;Acc:HGNC:30033]
PIANP	PILR alpha associated neural protein [Source:HGNC Symbol;Acc:HGNC:25338]
PIAS3	protein inhibitor of activated STAT 3 [Source:HGNC Symbol;Acc:HGNC:16861]
PIBF1	progesterone immunomodulatory binding factor 1 [Source:HGNC Symbol;Acc:HGNC:23352]
PICALM	phosphatidylinositol binding clathrin assembly protein [Source:HGNC Symbol;Acc:HGNC:15514]
PIGR	polymeric immunoglobulin receptor [Source:HGNC Symbol;Acc:HGNC:8968]
PIK3CB	phosphatidylinositol-4,5-bisphosphate 3-kinase catalytic subunit beta [Source:HGNC Symbol;Acc:HGNC:8976]
PIK3R1	phosphoinositide-3-kinase regulatory subunit 1 [Source:HGNC Symbol;Acc:HGNC:8979]
PIK3R6	phosphoinositide-3-kinase regulatory subunit 6 [Source:HGNC Symbol;Acc:HGNC:27101]
PIKFYVE	phosphoinositide kinase, FYVE-type zinc finger containing [Source:HGNC Symbol;Acc:HGNC:23785]
PIM1	Pim-1 proto-oncogene, serine/threonine kinase [Source:HGNC Symbol;Acc:HGNC:8986]
PIP4K2A	phosphatidylinositol-5-phosphate 4-kinase type 2 alpha [Source:HGNC Symbol;Acc:HGNC:8997]
PIR	pirin [Source:HGNC Symbol;Acc:HGNC:30048]
PITHD1	PITH domain containing 1 [Source:HGNC Symbol;Acc:HGNC:25022]
PJA2	praja ring finger ubiquitin ligase 2 [Source:HGNC Symbol;Acc:HGNC:17481]
PKN1	protein kinase N1 [Source:HGNC Symbol;Acc:HGNC:9405]
PKNOX1	PBX/knotted 1 homeobox 1 [Source:HGNC Symbol;Acc:HGNC:9022]
PLA2G1B	Phospholipase A2 [Source:UniProtKB/Swiss-Prot;Acc:P43434]
PLA2G2D	phospholipase A2 group IID [Source:HGNC Symbol;Acc:HGNC:9033]
PLA2G3	phospholipase A2 group III [Source:HGNC Symbol;Acc:HGNC:17934]
PLA2G4A	phospholipase A2 group IVA [Source:HGNC Symbol;Acc:HGNC:9035]
PLA2G5	phospholipase A2 group V [Source:HGNC Symbol;Acc:HGNC:9038]
PLCB1	phospholipase C beta 1 [Source:HGNC Symbol;Acc:HGNC:15917]
PLCG1	phospholipase C gamma 1 [Source:HGNC Symbol;Acc:HGNC:9065]
PLCG2	phospholipase C gamma 2 [Source:NCBI gene;Acc:100726796]
PLCL2	phospholipase C like 2 [Source:HGNC Symbol;Acc:HGNC:9064]
PLD4	phospholipase D family member 4 [Source:HGNC Symbol;Acc:HGNC:23792]
PLEK	pleckstrin [Source:HGNC Symbol;Acc:HGNC:9070]
PLEKHA1	pleckstrin homology domain containing A1 [Source:HGNC Symbol;Acc:HGNC:14335]
PML	promyelocytic leukemia [Source:HGNC Symbol;Acc:HGNC:9113]
PNP	purine nucleoside phosphorylase [Source:HGNC Symbol;Acc:HGNC:7892]
PODXL2	podocalyxin like 2 [Source:HGNC Symbol;Acc:HGNC:17936]
POLB	DNA polymerase beta [Source:HGNC Symbol;Acc:HGNC:9174]
POLR3A	RNA polymerase III subunit A [Source:HGNC Symbol;Acc:HGNC:30074]
POLR3B	RNA polymerase III subunit B [Source:HGNC Symbol;Acc:HGNC:30348]
POLR3C	RNA polymerase III subunit C [Source:HGNC Symbol;Acc:HGNC:30076]
POLR3D	RNA polymerase III subunit D [Source:HGNC Symbol;Acc:HGNC:1080]
POLR3F	RNA polymerase III subunit F [Source:HGNC Symbol;Acc:HGNC:15763]
POU2AF1	POU class 2 homeobox associating factor 1 [Source:HGNC Symbol;Acc:HGNC:9211]
POU2F2	POU class 2 homeobox 2 [Source:HGNC Symbol;Acc:HGNC:9213]
POU4F2	POU class 4 homeobox 2 [Source:HGNC Symbol;Acc:HGNC:9219]
PPARG	peroxisome proliferator activated receptor gamma [Source:HGNC Symbol;Acc:HGNC:9236]
PPARGC1B	PPARG coactivator 1 beta [Source:HGNC Symbol;Acc:HGNC:30022]
PPP2R3C	protein phosphatase 2 regulatory subunit B''gamma [Source:HGNC Symbol;Acc:HGNC:17485]
PPP3CB	protein phosphatase 3 catalytic subunit beta [Source:HGNC Symbol;Acc:HGNC:9315]
PQBP1	polyglutamine binding protein 1 [Source:HGNC Symbol;Acc:HGNC:9330]
PRDM1	PR/SET domain 1 [Source:HGNC Symbol;Acc:HGNC:9346]
PRDX1	peroxiredoxin 1 [Source:HGNC Symbol;Acc:HGNC:9352]
PRDX2	peroxiredoxin 2 [Source:HGNC Symbol;Acc:HGNC:9353]
PRDX3	peroxiredoxin 3 [Source:HGNC Symbol;Acc:HGNC:9354]
PRELID1	PRELI domain containing 1 [Source:HGNC Symbol;Acc:HGNC:30255]
PREX1	phosphatidylinositol-3,4,5-trisphosphate dependent Rac exchange factor 1 [Source:HGNC Symbol;Acc:HGNC:32594]
PRKAR1A	protein kinase cAMP-dependent type I regulatory subunit alpha [Source:HGNC Symbol;Acc:HGNC:9388]
PRKCB	protein kinase C beta [Source:HGNC Symbol;Acc:HGNC:9395]
PRKCD	protein kinase C delta [Source:HGNC Symbol;Acc:HGNC:9399]
PRKCE	protein kinase C epsilon [Source:HGNC Symbol;Acc:HGNC:9401]
PRKCQ	protein kinase C theta [Source:HGNC Symbol;Acc:HGNC:9410]
PRKCZ	protein kinase C zeta [Source:HGNC Symbol;Acc:HGNC:9412]
PRKD2	protein kinase D2 [Source:HGNC Symbol;Acc:HGNC:17293]
PRKDC	protein kinase, DNA-activated, catalytic subunit [Source:HGNC Symbol;Acc:HGNC:9413]
PRMT1	protein arginine methyltransferase 1 [Source:HGNC Symbol;Acc:HGNC:5187]
PRNP	prion protein [Source:HGNC Symbol;Acc:HGNC:9449]
PROCR	protein C receptor [Source:HGNC Symbol;Acc:HGNC:9452]
PRR7	proline rich 7, synaptic [Source:HGNC Symbol;Acc:HGNC:28130]
PRRC2C	proline rich coiled-coil 2C [Source:HGNC Symbol;Acc:HGNC:24903]
PRXL2A	peroxiredoxin like 2A [Source:HGNC Symbol;Acc:HGNC:28651]
PSEN1	presenilin 1 [Source:HGNC Symbol;Acc:HGNC:9508]
PSMA1	proteasome 20S subunit alpha 1 [Source:HGNC Symbol;Acc:HGNC:9530]
PSMB10	proteasome 20S subunit beta 10 [Source:HGNC Symbol;Acc:HGNC:9538]
PSMB11	proteasome subunit beta 11 [Source:HGNC Symbol;Acc:HGNC:31963]
PSMB4	proteasome 20S subunit beta 4 [Source:HGNC Symbol;Acc:HGNC:9541]
PSMB9	proteasome 20S subunit beta 9 [Source:HGNC Symbol;Acc:HGNC:9546]
PSME1	proteasome activator subunit 1 [Source:HGNC Symbol;Acc:HGNC:9568]
PSPC1	paraspeckle component 1 [Source:HGNC Symbol;Acc:HGNC:20320]
PTGER4	prostaglandin E receptor 4 [Source:HGNC Symbol;Acc:HGNC:9596]
PTK2B	protein tyrosine kinase 2 beta [Source:NCBI gene;Acc:100734027]
PTN	pleiotrophin [Source:HGNC Symbol;Acc:HGNC:9630]
PTPN11	protein tyrosine phosphatase non-receptor type 11 [Source:HGNC Symbol;Acc:HGNC:9644]
PTPN2	protein tyrosine phosphatase non-receptor type 2 [Source:HGNC Symbol;Acc:HGNC:9650]
PTPN6	protein tyrosine phosphatase non-receptor type 6 [Source:HGNC Symbol;Acc:HGNC:9658]
PTPRC	protein tyrosine phosphatase receptor type C [Source:HGNC Symbol;Acc:HGNC:9666]
PTPRZ1	protein tyrosine phosphatase receptor type Z1 [Source:HGNC Symbol;Acc:HGNC:9685]
PTX3	pentraxin 3 [Source:HGNC Symbol;Acc:HGNC:9692]
PUM2	pumilio RNA binding family member 2 [Source:NCBI gene;Acc:100717479]
PUS7	pseudouridine synthase 7 [Source:HGNC Symbol;Acc:HGNC:26033]
PVRIG	PVR related immunoglobulin domain containing [Source:HGNC Symbol;Acc:HGNC:32190]
PYCARD	PYD and CARD domain containing [Source:HGNC Symbol;Acc:HGNC:16608]
PYGO1	pygopus family PHD finger 1 [Source:HGNC Symbol;Acc:HGNC:30256]
RAB10	RAB10, member RAS oncogene family [Source:HGNC Symbol;Acc:HGNC:9759]
RAB17	RAB17, member RAS oncogene family [Source:HGNC Symbol;Acc:HGNC:16523]
RAB20	RAB20, member RAS oncogene family [Source:HGNC Symbol;Acc:HGNC:18260]
RAB27A	RAB27A, member RAS oncogene family [Source:HGNC Symbol;Acc:HGNC:9766]
RAB29	RAB29, member RAS oncogene family [Source:HGNC Symbol;Acc:HGNC:9789]
RAB32	RAB32, member RAS oncogene family [Source:HGNC Symbol;Acc:HGNC:9772]
RAB33A	RAB33A, member RAS oncogene family [Source:HGNC Symbol;Acc:HGNC:9773]
RAB35	RAB35, member RAS oncogene family [Source:HGNC Symbol;Acc:HGNC:9774]
RAB3B	RAB3B, member RAS oncogene family [Source:HGNC Symbol;Acc:HGNC:9778]
RAB3C	RAB3C, member RAS oncogene family [Source:HGNC Symbol;Acc:HGNC:30269]
RAB43	RAB43, member RAS oncogene family [Source:HGNC Symbol;Acc:HGNC:19983]
RAB4A	RAB4A, member RAS oncogene family [Source:HGNC Symbol;Acc:HGNC:9781]
RAB5B	RAB5B, member RAS oncogene family [Source:HGNC Symbol;Acc:HGNC:9784]
RAB6A	RAB6A, member RAS oncogene family [Source:HGNC Symbol;Acc:HGNC:9786]
RAB7B	RAB7B, member RAS oncogene family [Source:NCBI gene;Acc:100717487]
RAB8B	RAB8B, member RAS oncogene family [Source:HGNC Symbol;Acc:HGNC:30273]
RABL3	RAB, member of RAS oncogene family like 3 [Source:HGNC Symbol;Acc:HGNC:18072]
RAC1	Rac family small GTPase 1 [Source:HGNC Symbol;Acc:HGNC:9801]
RAC2	Rac family small GTPase 2 [Source:HGNC Symbol;Acc:HGNC:9802]
RAF1	Raf-1 proto-oncogene, serine/threonine kinase [Source:HGNC Symbol;Acc:HGNC:9829]
RAG1	recombination activating 1 [Source:HGNC Symbol;Acc:HGNC:9831]
RARA	retinoic acid receptor alpha [Source:HGNC Symbol;Acc:HGNC:9864]
RARG	retinoic acid receptor gamma [Source:HGNC Symbol;Acc:HGNC:9866]
RARRES2	retinoic acid receptor responder 2 [Source:HGNC Symbol;Acc:HGNC:9868]
RASAL3	RAS protein activator like 3 [Source:HGNC Symbol;Acc:HGNC:26129]
RASGRP1	RAS guanyl releasing protein 1 [Source:HGNC Symbol;Acc:HGNC:9878]
RASSF2	Ras association domain family member 2 [Source:NCBI gene;Acc:100714425]
RB1	RB transcriptional corepressor 1 [Source:HGNC Symbol;Acc:HGNC:9884]
RBCK1	RANBP2-type and C3HC4-type zinc finger containing 1 [Source:HGNC Symbol;Acc:HGNC:15864]
RBFOX2	RNA binding fox-1 homolog 2 [Source:HGNC Symbol;Acc:HGNC:9906]
RBM14	RNA binding motif protein 14 [Source:HGNC Symbol;Acc:HGNC:14219]
RBM15	RNA binding motif protein 15 [Source:HGNC Symbol;Acc:HGNC:14959]
RBM47	RNA binding motif protein 47 [Source:HGNC Symbol;Acc:HGNC:30358]
RBP1	retinol binding protein 1 [Source:HGNC Symbol;Acc:HGNC:9919]
RBPJ	recombination signal binding protein for immunoglobulin kappa J region [Source:HGNC Symbol;Acc:HGNC:5724]
RC3H1	ring finger and CCCH-type domains 1 [Source:HGNC Symbol;Acc:HGNC:29434]
RC3H2	ring finger and CCCH-type domains 2 [Source:NCBI gene;Acc:100713655]
RCOR1	REST corepressor 1 [Source:HGNC Symbol;Acc:HGNC:17441]
RELA	RELA proto-oncogene, NF-kB subunit [Source:HGNC Symbol;Acc:HGNC:9955]
RELB	RELB proto-oncogene, NF-kB subunit [Source:HGNC Symbol;Acc:HGNC:9956]
RFTN1	raftlin, lipid raft linker 1 [Source:HGNC Symbol;Acc:HGNC:30278]
RGCC	regulator of cell cycle [Source:HGNC Symbol;Acc:HGNC:20369]
RHAG	Rh associated glycoprotein [Source:HGNC Symbol;Acc:HGNC:10006]
RHBDD3	rhomboid domain containing 3 [Source:HGNC Symbol;Acc:HGNC:1308]
RHEX	regulator of hemoglobinization and erythroid cell expansion [Source:HGNC Symbol;Acc:HGNC:25341]
RHOA	ras homolog family member A [Source:HGNC Symbol;Acc:HGNC:667]
RHOH	ras homolog family member H [Source:NCBI gene;Acc:100717196]
RIF1	replication timing regulatory factor 1 [Source:HGNC Symbol;Acc:HGNC:23207]
RIOK3	RIO kinase 3 [Source:HGNC Symbol;Acc:HGNC:11451]
RIPK1	receptor interacting serine/threonine kinase 1 [Source:HGNC Symbol;Acc:HGNC:10019]
RIPK2	receptor interacting serine/threonine kinase 2 [Source:HGNC Symbol;Acc:HGNC:10020]
RIPK3	receptor interacting serine/threonine kinase 3 [Source:HGNC Symbol;Acc:HGNC:10021]
RIPOR2	RHO family interacting cell polarization regulator 2 [Source:HGNC Symbol;Acc:HGNC:13872]
RNF125	ring finger protein 125 [Source:HGNC Symbol;Acc:HGNC:21150]
RNF135	ring finger protein 135 [Source:HGNC Symbol;Acc:HGNC:21158]
RNF19B	ring finger protein 19B [Source:HGNC Symbol;Acc:HGNC:26886]
RNF216	ring finger protein 216 [Source:HGNC Symbol;Acc:HGNC:21698]
RNF26	ring finger protein 26 [Source:HGNC Symbol;Acc:HGNC:14646]
RNF41	ring finger protein 41 [Source:HGNC Symbol;Acc:HGNC:18401]
RO60	Ro60, Y RNA binding protein [Source:HGNC Symbol;Acc:HGNC:11313]
ROCK1	Rho associated coiled-coil containing protein kinase 1 [Source:HGNC Symbol;Acc:HGNC:10251]
ROGDI	rogdi atypical leucine zipper [Source:HGNC Symbol;Acc:HGNC:29478]
ROMO1	reactive oxygen species modulator 1 [Source:HGNC Symbol;Acc:HGNC:16185]
RORA	RAR related orphan receptor A [Source:HGNC Symbol;Acc:HGNC:10258]
RPL22	ribosomal protein L22 [Source:HGNC Symbol;Acc:HGNC:10315]
RPS14	ribosomal protein S14 [Source:HGNC Symbol;Acc:HGNC:10387]
RPS19	ribosomal protein S19 [Source:HGNC Symbol;Acc:HGNC:10402]
RPS6KB1	ribosomal protein S6 kinase B1 [Source:HGNC Symbol;Acc:HGNC:10436]
RRAS	RAS related [Source:HGNC Symbol;Acc:HGNC:10447]
RRS1	ribosome biogenesis regulator 1 homolog [Source:HGNC Symbol;Acc:HGNC:17083]
RSAD2	radical S-adenosyl methionine domain containing 2 [Source:HGNC Symbol;Acc:HGNC:30908]
RUNX1	RUNX family transcription factor 1 [Source:HGNC Symbol;Acc:HGNC:10471]
RUNX2	RUNX family transcription factor 2 [Source:HGNC Symbol;Acc:HGNC:10472]
S100A14	S100 calcium binding protein A14 [Source:HGNC Symbol;Acc:HGNC:18901]
S1PR1	sphingosine-1-phosphate receptor 1 [Source:HGNC Symbol;Acc:HGNC:3165]
SARM1	sterile alpha and TIR motif containing 1 [Source:HGNC Symbol;Acc:HGNC:17074]
SART1	spliceosome associated factor 1, recruiter of U4/U6.U5 tri-snRNP [Source:HGNC Symbol;Acc:HGNC:10538]
SART3	spliceosome associated factor 3, U4/U6 recycling protein [Source:HGNC Symbol;Acc:HGNC:16860]
SASH3	SAM and SH3 domain containing 3 [Source:HGNC Symbol;Acc:HGNC:15975]
SBDS	SBDS ribosome maturation factor [Source:HGNC Symbol;Acc:HGNC:19440]
SBNO2	strawberry notch homolog 2 [Source:HGNC Symbol;Acc:HGNC:29158]
SCAP	SREBF chaperone [Source:NCBI gene;Acc:100720182]
SCIMP	SLP adaptor and CSK interacting membrane protein [Source:HGNC Symbol;Acc:HGNC:33504]
SCIN	scinderin [Source:HGNC Symbol;Acc:HGNC:21695]
SCRIB	scribble planar cell polarity protein [Source:HGNC Symbol;Acc:HGNC:30377]
SDC4	syndecan 4 [Source:HGNC Symbol;Acc:HGNC:10661]
SDHAF4	succinate dehydrogenase complex assembly factor 4 [Source:HGNC Symbol;Acc:HGNC:20957]
SEC14L1	SEC14 like lipid binding 1 [Source:HGNC Symbol;Acc:HGNC:10698]
SELE	selectin E [Source:HGNC Symbol;Acc:HGNC:10718]
SELL	selectin L [Source:HGNC Symbol;Acc:HGNC:10720]
SELP	selectin P [Source:HGNC Symbol;Acc:HGNC:10721]
SERINC3	serine incorporator 3 [Source:HGNC Symbol;Acc:HGNC:11699]
SERINC5	serine incorporator 5 [Source:HGNC Symbol;Acc:HGNC:18825]
SERPINB12	serpin family B member 12 [Source:HGNC Symbol;Acc:HGNC:14220]
SERPINE1	serpin family E member 1 [Source:HGNC Symbol;Acc:HGNC:8583]
SETD1A	SET domain containing 1A, histone lysine methyltransferase [Source:HGNC Symbol;Acc:HGNC:29010]
SETD2	SET domain containing 2, histone lysine methyltransferase [Source:HGNC Symbol;Acc:HGNC:18420]
SFRP2	secreted frizzled related protein 2 [Source:HGNC Symbol;Acc:HGNC:10777]
SFTPD	surfactant protein D [Source:HGNC Symbol;Acc:HGNC:10803]
SFXN1	sideroflexin 1 [Source:HGNC Symbol;Acc:HGNC:16085]
SH2B2	SH2B adaptor protein 2 [Source:HGNC Symbol;Acc:HGNC:17381]
SH2B3	SH2B adaptor protein 3 [Source:HGNC Symbol;Acc:HGNC:29605]
SH2D1A	SH2 domain containing 1A [Source:HGNC Symbol;Acc:HGNC:10820]
SH3KBP1	SH3 domain containing kinase binding protein 1 [Source:HGNC Symbol;Acc:HGNC:13867]
SH3PXD2A	SH3 and PX domains 2A [Source:HGNC Symbol;Acc:HGNC:23664]
SHFL	shiftless antiviral inhibitor of ribosomal frameshifting [Source:HGNC Symbol;Acc:HGNC:25649]
SHH	sonic hedgehog signaling molecule [Source:HGNC Symbol;Acc:HGNC:10848]
SHLD1	shieldin complex subunit 1 [Source:HGNC Symbol;Acc:HGNC:26318]
SHLD2	shieldin complex subunit 2 [Source:HGNC Symbol;Acc:HGNC:28773]
SHMT2	serine hydroxymethyltransferase 2 [Source:HGNC Symbol;Acc:HGNC:10852]
SIAE	sialic acid acetylesterase [Source:HGNC Symbol;Acc:HGNC:18187]
SIN3A	SIN3 transcription regulator family member A [Source:HGNC Symbol;Acc:HGNC:19353]
SIPA1L3	signal induced proliferation associated 1 like 3 [Source:HGNC Symbol;Acc:HGNC:23801]
SIRT1	sirtuin 1 [Source:HGNC Symbol;Acc:HGNC:14929]
SIT1	signaling threshold regulating transmembrane adaptor 1 [Source:HGNC Symbol;Acc:HGNC:17710]
SIX1	SIX homeobox 1 [Source:HGNC Symbol;Acc:HGNC:10887]
SKAP1	src kinase associated phosphoprotein 1 [Source:NCBI gene;Acc:100720505]
SKIL	SKI like proto-oncogene [Source:HGNC Symbol;Acc:HGNC:10897]
SLA2	Src like adaptor 2 [Source:HGNC Symbol;Acc:HGNC:17329]
SLC11A1	solute carrier family 11 member 1 [Source:HGNC Symbol;Acc:HGNC:10907]
SLC11A2	solute carrier family 11 member 2 [Source:HGNC Symbol;Acc:HGNC:10908]
SLC12A2	solute carrier family 12 member 2 [Source:HGNC Symbol;Acc:HGNC:10911]
SLC15A4	solute carrier family 15 member 4 [Source:HGNC Symbol;Acc:HGNC:23090]
SLC25A38	solute carrier family 25 member 38 [Source:HGNC Symbol;Acc:HGNC:26054]
SLC26A6	solute carrier family 26 member 6 [Source:HGNC Symbol;Acc:HGNC:14472]
SLC37A4	solute carrier family 37 member 4 [Source:HGNC Symbol;Acc:HGNC:4061]
SLC39A10	solute carrier family 39 member 10 [Source:HGNC Symbol;Acc:HGNC:20861]
SLC39A3	solute carrier family 39 member 3 [Source:HGNC Symbol;Acc:HGNC:17128]
SLC40A1	solute carrier family 40 member 1 [Source:HGNC Symbol;Acc:HGNC:10909]
SLC46A2	solute carrier family 46 member 2 [Source:HGNC Symbol;Acc:HGNC:16055]
SLC7A11	solute carrier family 7 member 11 [Source:HGNC Symbol;Acc:HGNC:11059]
SLC7A6OS	solute carrier family 7 member 6 opposite strand [Source:HGNC Symbol;Acc:HGNC:25807]
SLC8A3	solute carrier family 8 member A3 [Source:HGNC Symbol;Acc:HGNC:11070]
SLC9B2	solute carrier family 9 member B2 [Source:HGNC Symbol;Acc:HGNC:25143]
SLPI	secretory leukocyte peptidase inhibitor [Source:HGNC Symbol;Acc:HGNC:11092]
SMAD3	SMAD family member 3 [Source:HGNC Symbol;Acc:HGNC:6769]
SMAD5	SMAD family member 5 [Source:HGNC Symbol;Acc:HGNC:6771]
SMAD6	SMAD family member 6 [Source:HGNC Symbol;Acc:HGNC:6772]
SMAP1	small ArfGAP 1 [Source:HGNC Symbol;Acc:HGNC:19651]
SMPD1	sphingomyelin phosphodiesterase 1 [Source:HGNC Symbol;Acc:HGNC:11120]
SMPD3	sphingomyelin phosphodiesterase 3 [Source:HGNC Symbol;Acc:HGNC:14240]
SNAP23	synaptosome associated protein 23 [Source:HGNC Symbol;Acc:HGNC:11131]
SNCA	synuclein alpha [Source:HGNC Symbol;Acc:HGNC:11138]
SNX10	sorting nexin 10 [Source:HGNC Symbol;Acc:HGNC:14974]
SNX4	sorting nexin 4 [Source:HGNC Symbol;Acc:HGNC:11175]
SOCS1	suppressor of cytokine signaling 1 [Source:HGNC Symbol;Acc:HGNC:19383]
SOCS5	suppressor of cytokine signaling 5 [Source:NCBI gene;Acc:100722912]
SOCS6	suppressor of cytokine signaling 6 [Source:HGNC Symbol;Acc:HGNC:16833]
SOD1	Superoxide dismutase [Cu-Zn] [Source:UniProtKB/Swiss-Prot;Acc:P33431]
SOD2	superoxide dismutase 2 [Source:HGNC Symbol;Acc:HGNC:11180]
SOS1	SOS Ras/Rac guanine nucleotide exchange factor 1 [Source:HGNC Symbol;Acc:HGNC:11187]
SOS2	SOS Ras/Rho guanine nucleotide exchange factor 2 [Source:HGNC Symbol;Acc:HGNC:11188]
SOX11	SRY-box transcription factor 11 [Source:HGNC Symbol;Acc:HGNC:11191]
SOX12	SRY-box transcription factor 12 [Source:HGNC Symbol;Acc:HGNC:11198]
SOX13	SRY-box transcription factor 13 [Source:HGNC Symbol;Acc:HGNC:11192]
SP3	Sp3 transcription factor [Source:HGNC Symbol;Acc:HGNC:11208]
SP7	Sp7 transcription factor [Source:HGNC Symbol;Acc:HGNC:17321]
SPHK1	sphingosine kinase 1 [Source:HGNC Symbol;Acc:HGNC:11240]
SPHK2	sphingosine kinase 2 [Source:HGNC Symbol;Acc:HGNC:18859]
SPI1	Spi-1 proto-oncogene [Source:HGNC Symbol;Acc:HGNC:11241]
SPINK5	serine peptidase inhibitor, Kazal type 5 [Source:HGNC Symbol;Acc:HGNC:15464]
SPNS2	sphingolipid transporter 2 [Source:HGNC Symbol;Acc:HGNC:26992]
SPON2	spondin 2 [Source:HGNC Symbol;Acc:HGNC:11253]
SPPL2A	signal peptide peptidase like 2A [Source:HGNC Symbol;Acc:HGNC:30227]
SPPL2B	signal peptide peptidase like 2B [Source:HGNC Symbol;Acc:HGNC:30627]
SPPL3	signal peptide peptidase like 3 [Source:HGNC Symbol;Acc:HGNC:30424]
SPTA1	spectrin alpha, erythrocytic 1 [Source:NCBI gene;Acc:100722803]
SRC	SRC proto-oncogene, non-receptor tyrosine kinase [Source:HGNC Symbol;Acc:HGNC:11283]
SRF	serum response factor [Source:HGNC Symbol;Acc:HGNC:11291]
SRP54	signal recognition particle 54 [Source:HGNC Symbol;Acc:HGNC:11301]
SSBP3	single stranded DNA binding protein 3 [Source:HGNC Symbol;Acc:HGNC:15674]
ST3GAL1	ST3 beta-galactoside alpha-2,3-sialyltransferase 1 [Source:NCBI gene;Acc:100720961]
ST3GAL4	ST3 beta-galactoside alpha-2,3-sialyltransferase 4 [Source:NCBI gene;Acc:100729178]
STAP1	signal transducing adaptor family member 1 [Source:HGNC Symbol;Acc:HGNC:24133]
STAT2	signal transducer and activator of transcription 2 [Source:HGNC Symbol;Acc:HGNC:11363]
STAT3	signal transducer and activator of transcription 3 [Source:HGNC Symbol;Acc:HGNC:11364]
STAT6	signal transducer and activator of transcription 6 [Source:HGNC Symbol;Acc:HGNC:11368]
STING1	stimulator of interferon response cGAMP interactor 1 [Source:HGNC Symbol;Acc:HGNC:27962]
STK10	serine/threonine kinase 10 [Source:HGNC Symbol;Acc:HGNC:11388]
STK11	serine/threonine kinase 11 [Source:HGNC Symbol;Acc:HGNC:11389]
STK3	serine/threonine kinase 3 [Source:HGNC Symbol;Acc:HGNC:11406]
STK39	serine/threonine kinase 39 [Source:HGNC Symbol;Acc:HGNC:17717]
STK4	serine/threonine kinase 4 [Source:HGNC Symbol;Acc:HGNC:11408]
STOML2	stomatin like 2 [Source:HGNC Symbol;Acc:HGNC:14559]
STX4	syntaxin 4 [Source:HGNC Symbol;Acc:HGNC:11439]
STX7	syntaxin 7 [Source:HGNC Symbol;Acc:HGNC:11442]
STX8	syntaxin 8 [Source:HGNC Symbol;Acc:HGNC:11443]
STXBP1	syntaxin binding protein 1 [Source:HGNC Symbol;Acc:HGNC:11444]
STXBP2	syntaxin binding protein 2 [Source:HGNC Symbol;Acc:HGNC:11445]
STXBP3	syntaxin binding protein 3 [Source:HGNC Symbol;Acc:HGNC:11446]
STXBP4	syntaxin binding protein 4 [Source:HGNC Symbol;Acc:HGNC:19694]
SUCNR1	succinate receptor 1 [Source:HGNC Symbol;Acc:HGNC:4542]
SUPT6H	SPT6 homolog, histone chaperone and transcription elongation factor [Source:HGNC Symbol;Acc:HGNC:11470]
SWAP70	switching B cell complex subunit SWAP70 [Source:HGNC Symbol;Acc:HGNC:17070]
SYK	spleen associated tyrosine kinase [Source:HGNC Symbol;Acc:HGNC:11491]
SYNCRIP	synaptotagmin binding cytoplasmic RNA interacting protein [Source:HGNC Symbol;Acc:HGNC:16918]
SYT11	synaptotagmin 11 [Source:HGNC Symbol;Acc:HGNC:19239]
TAFA4	TAFA chemokine like family member 4 [Source:HGNC Symbol;Acc:HGNC:21591]
TAL1	TAL bHLH transcription factor 1, erythroid differentiation factor [Source:HGNC Symbol;Acc:HGNC:11556]
TAP1	transporter 1, ATP binding cassette subfamily B member [Source:HGNC Symbol;Acc:HGNC:43]
TAPBP	TAP binding protein [Source:HGNC Symbol;Acc:HGNC:11566]
TAPBPL	TAP binding protein like [Source:HGNC Symbol;Acc:HGNC:30683]
TARBP2	TARBP2 subunit of RISC loading complex [Source:HGNC Symbol;Acc:HGNC:11569]
TASL	chromosome X open reading frame 21 [Source:HGNC Symbol;Acc:HGNC:25667]
TBC1D10C	TBC1 domain family member 10C [Source:HGNC Symbol;Acc:HGNC:24702]
TBK1	TANK binding kinase 1 [Source:NCBI gene;Acc:100731956]
TBX21	T-box transcription factor 21 [Source:HGNC Symbol;Acc:HGNC:11599]
TCF21	transcription factor 21 [Source:HGNC Symbol;Acc:HGNC:11632]
TCIM	transcriptional and immune response regulator [Source:HGNC Symbol;Acc:HGNC:1357]
TCIRG1	T cell immune regulator 1, ATPase H+ transporting V0 subunit a3 [Source:HGNC Symbol;Acc:HGNC:11647]
TCTA	T cell leukemia translocation altered [Source:HGNC Symbol;Acc:HGNC:11692]
TDGF1	teratocarcinoma-derived growth factor 1 [Source:HGNC Symbol;Acc:HGNC:11701]
TEC	tec protein tyrosine kinase [Source:HGNC Symbol;Acc:HGNC:11719]
TENT2	terminal nucleotidyltransferase 2 [Source:HGNC Symbol;Acc:HGNC:26776]
TESC	tescalcin [Source:HGNC Symbol;Acc:HGNC:26065]
TESPA1	thymocyte expressed, positive selection associated 1 [Source:HGNC Symbol;Acc:HGNC:29109]
TFE3	transcription factor binding to IGHM enhancer 3 [Source:HGNC Symbol;Acc:HGNC:11752]
TFEB	transcription factor EB [Source:HGNC Symbol;Acc:HGNC:11753]
TFRC	transferrin receptor [Source:HGNC Symbol;Acc:HGNC:11763]
TGFB1	transforming growth factor beta 1 [Source:HGNC Symbol;Acc:HGNC:11766]
TGFB2	transforming growth factor beta 2 [Source:HGNC Symbol;Acc:HGNC:11768]
TGFB3	transforming growth factor beta 3 [Source:HGNC Symbol;Acc:HGNC:11769]
TGFBR1	transforming growth factor beta receptor 1 [Source:HGNC Symbol;Acc:HGNC:11772]
TGFBR2	transforming growth factor beta receptor 2 [Source:HGNC Symbol;Acc:HGNC:11773]
THBS1	thrombospondin 1 [Source:HGNC Symbol;Acc:HGNC:11785]
THBS4	thrombospondin 4 [Source:HGNC Symbol;Acc:HGNC:11788]
THEMIS	thymocyte selection associated [Source:HGNC Symbol;Acc:HGNC:21569]
THEMIS2	thymocyte selection associated family member 2 [Source:HGNC Symbol;Acc:HGNC:16839]
THOC1	THO complex 1 [Source:HGNC Symbol;Acc:HGNC:19070]
THOC5	THO complex 5 [Source:NCBI gene;Acc:100716118]
THRA	thyroid hormone receptor alpha [Source:HGNC Symbol;Acc:HGNC:11796]
THY1	Thy-1 cell surface antigen [Source:HGNC Symbol;Acc:HGNC:11801]
TICAM1	toll like receptor adaptor molecule 1 [Source:HGNC Symbol;Acc:HGNC:18348]
TIPARP	TCDD inducible poly(ADP-ribose) polymerase [Source:HGNC Symbol;Acc:HGNC:23696]
TKFC	triokinase and FMN cyclase [Source:HGNC Symbol;Acc:HGNC:24552]
TLR1	toll like receptor 1 [Source:HGNC Symbol;Acc:HGNC:11847]
TLR10	toll like receptor 10 [Source:HGNC Symbol;Acc:HGNC:15634]
TLR2	toll like receptor 2 [Source:HGNC Symbol;Acc:HGNC:11848]
TLR3	toll like receptor 3 [Source:HGNC Symbol;Acc:HGNC:11849]
TLR4	toll like receptor 4 [Source:HGNC Symbol;Acc:HGNC:11850]
TLR6	toll like receptor 6 [Source:HGNC Symbol;Acc:HGNC:16711]
TLR7	toll like receptor 7 [Source:HGNC Symbol;Acc:HGNC:15631]
TMBIM6	transmembrane BAX inhibitor motif containing 6 [Source:HGNC Symbol;Acc:HGNC:11723]
TMEM102	transmembrane protein 102 [Source:HGNC Symbol;Acc:HGNC:26722]
TMEM131L	transmembrane 131 like [Source:HGNC Symbol;Acc:HGNC:29146]
TMEM14C	transmembrane protein 14C [Source:HGNC Symbol;Acc:HGNC:20952]
TMEM176A	transmembrane protein 176A [Source:HGNC Symbol;Acc:HGNC:24930]
TMEM178A	transmembrane protein 178A [Source:HGNC Symbol;Acc:HGNC:28517]
TMEM190	transmembrane protein 190 [Source:HGNC Symbol;Acc:HGNC:29632]
TMEM64	transmembrane protein 64 [Source:HGNC Symbol;Acc:HGNC:25441]
TMEM98	transmembrane protein 98 [Source:HGNC Symbol;Acc:HGNC:24529]
TMOD3	tropomodulin 3 [Source:HGNC Symbol;Acc:HGNC:11873]
TNFAIP1	TNF alpha induced protein 1 [Source:HGNC Symbol;Acc:HGNC:11894]
TNFAIP3	TNF alpha induced protein 3 [Source:HGNC Symbol;Acc:HGNC:11896]
TNFAIP8L2	TNF alpha induced protein 8 like 2 [Source:HGNC Symbol;Acc:HGNC:26277]
TNFRSF13B	TNF receptor superfamily member 13B [Source:NCBI gene;Acc:100726640]
TNFRSF1B	TNF receptor superfamily member 1B [Source:NCBI gene;Acc:100723273]
TNFRSF21	TNF receptor superfamily member 21 [Source:HGNC Symbol;Acc:HGNC:13469]
TNFSF10	TNF superfamily member 10 [Source:HGNC Symbol;Acc:HGNC:11925]
TNFSF11	TNF superfamily member 11 [Source:HGNC Symbol;Acc:HGNC:11926]
TNFSF12	TNF superfamily member 12 [Source:HGNC Symbol;Acc:HGNC:11927]
TNFSF13	TNF superfamily member 13 [Source:HGNC Symbol;Acc:HGNC:11928]
TNFSF14	TNF superfamily member 14 [Source:HGNC Symbol;Acc:HGNC:11930]
TNFSF15	TNF superfamily member 15 [Source:HGNC Symbol;Acc:HGNC:11931]
TNFSF18	TNF superfamily member 18 [Source:HGNC Symbol;Acc:HGNC:11932]
TNFSF4	TNF superfamily member 4 [Source:HGNC Symbol;Acc:HGNC:11934]
TNFSF8	TNF superfamily member 8 [Source:HGNC Symbol;Acc:HGNC:11938]
TOB2	transducer of ERBB2, 2 [Source:HGNC Symbol;Acc:HGNC:11980]
TOLLIP	toll interacting protein [Source:HGNC Symbol;Acc:HGNC:16476]
TOMM70	translocase of outer mitochondrial membrane 70 [Source:HGNC Symbol;Acc:HGNC:11985]
TOX	thymocyte selection associated high mobility group box [Source:HGNC Symbol;Acc:HGNC:18988]
TP53	Cellular tumor antigen p53 [Source:UniProtKB/Swiss-Prot;Acc:Q9WUR6]
TRAF2	TNF receptor associated factor 2 [Source:HGNC Symbol;Acc:HGNC:12032]
TRAF3	TNF receptor associated factor 3 [Source:HGNC Symbol;Acc:HGNC:12033]
TRAF3IP1	TRAF3 interacting protein 1 [Source:NCBI gene;Acc:100728161]
TRAF3IP2	TRAF3 interacting protein 2 [Source:HGNC Symbol;Acc:HGNC:1343]
TRAF6	TNF receptor associated factor 6 [Source:HGNC Symbol;Acc:HGNC:12036]
TRAFD1	TRAF-type zinc finger domain containing 1 [Source:HGNC Symbol;Acc:HGNC:24808]
TRAT1	T cell receptor associated transmembrane adaptor 1 [Source:HGNC Symbol;Acc:HGNC:30698]
TREM2	triggering receptor expressed on myeloid cells 2 [Source:HGNC Symbol;Acc:HGNC:17761]
TREX1	three prime repair exonuclease 1 [Source:HGNC Symbol;Acc:HGNC:12269]
TRIB1	tribbles pseudokinase 1 [Source:HGNC Symbol;Acc:HGNC:16891]
TRIM10	tripartite motif containing 10 [Source:HGNC Symbol;Acc:HGNC:10072]
TRIM11	tripartite motif containing 11 [Source:HGNC Symbol;Acc:HGNC:16281]
TRIM13	tripartite motif containing 13 [Source:NCBI gene;Acc:100720557]
TRIM21	tripartite motif containing 21 [Source:HGNC Symbol;Acc:HGNC:11312]
TRIM25	tripartite motif containing 25 [Source:HGNC Symbol;Acc:HGNC:12932]
TRIM26	tripartite motif-containing protein 26-like [Source:NCBI gene;Acc:100734574]
TRIM27	tripartite motif containing 27 [Source:HGNC Symbol;Acc:HGNC:9975]
TRIM32	tripartite motif containing 32 [Source:HGNC Symbol;Acc:HGNC:16380]
TRIM35	tripartite motif containing 35 [Source:HGNC Symbol;Acc:HGNC:16285]
TRIM44	tripartite motif containing 44 [Source:HGNC Symbol;Acc:HGNC:19016]
TRIM55	tripartite motif containing 55 [Source:HGNC Symbol;Acc:HGNC:14215]
TRIM6	tripartite motif containing 6 [Source:NCBI gene;Acc:100716342]
TRIM62	tripartite motif containing 62 [Source:NCBI gene;Acc:100726017]
TRIM8	tripartite motif containing 8 [Source:HGNC Symbol;Acc:HGNC:15579]
TRPM2	transient receptor potential cation channel subfamily M member 2 [Source:HGNC Symbol;Acc:HGNC:12339]
TRPM4	transient receptor potential cation channel subfamily M member 4 [Source:HGNC Symbol;Acc:HGNC:17993]
TRPV4	transient receptor potential cation channel subfamily V member 4 [Source:HGNC Symbol;Acc:HGNC:18083]
TSC1	TSC complex subunit 1 [Source:NCBI gene;Acc:100732297]
TSC22D3	TSC22 domain family member 3 [Source:HGNC Symbol;Acc:HGNC:3051]
TSHR	thyroid stimulating hormone receptor [Source:HGNC Symbol;Acc:HGNC:12373]
TSPAN2	tetraspanin 2 [Source:HGNC Symbol;Acc:HGNC:20659]
TSPAN32	tetraspanin 32 [Source:HGNC Symbol;Acc:HGNC:13410]
TSPAN6	tetraspanin 6 [Source:HGNC Symbol;Acc:HGNC:11858]
TSPO2	translocator protein 2 [Source:HGNC Symbol;Acc:HGNC:21256]
TTBK1	tau tubulin kinase 1 [Source:HGNC Symbol;Acc:HGNC:19140]
TTC4	tetratricopeptide repeat domain 4 [Source:HGNC Symbol;Acc:HGNC:12394]
TTC7A	tetratricopeptide repeat domain 7A [Source:HGNC Symbol;Acc:HGNC:19750]
TTLL1	tubulin tyrosine ligase like 1 [Source:HGNC Symbol;Acc:HGNC:1312]
TTLL12	tubulin tyrosine ligase like 12 [Source:HGNC Symbol;Acc:HGNC:28974]
TUSC2	tumor suppressor 2, mitochondrial calcium regulator [Source:HGNC Symbol;Acc:HGNC:17034]
TWSG1	twisted gastrulation BMP signaling modulator 1 [Source:HGNC Symbol;Acc:HGNC:12429]
TXK	TXK tyrosine kinase [Source:HGNC Symbol;Acc:HGNC:12434]
TXLNA	taxilin alpha [Source:HGNC Symbol;Acc:HGNC:30685]
TYR	tyrosinase [Source:HGNC Symbol;Acc:HGNC:12442]
TYRO3	TYRO3 protein tyrosine kinase [Source:HGNC Symbol;Acc:HGNC:12446]
UBA5	ubiquitin like modifier activating enzyme 5 [Source:HGNC Symbol;Acc:HGNC:23230]
UBASH3A	ubiquitin associated and SH3 domain containing A [Source:HGNC Symbol;Acc:HGNC:12462]
UBASH3B	ubiquitin associated and SH3 domain containing B [Source:NCBI gene;Acc:100721999]
UBE2K	ubiquitin conjugating enzyme E2 K [Source:HGNC Symbol;Acc:HGNC:4914]
UFD1	ubiquitin recognition factor in ER associated degradation 1 [Source:HGNC Symbol;Acc:HGNC:12520]
UFL1	UFM1 specific ligase 1 [Source:HGNC Symbol;Acc:HGNC:23039]
UMOD	uromodulin [Source:HGNC Symbol;Acc:HGNC:12559]
UNC13D	unc-13 homolog D [Source:HGNC Symbol;Acc:HGNC:23147]
USP15	ubiquitin specific peptidase 15 [Source:HGNC Symbol;Acc:HGNC:12613]
VAMP3	vesicle associated membrane protein 3 [Source:HGNC Symbol;Acc:HGNC:12644]
VAMP7	vesicle associated membrane protein 7 [Source:HGNC Symbol;Acc:HGNC:11486]
VAMP8	vesicle associated membrane protein 8 [Source:HGNC Symbol;Acc:HGNC:12647]
VAV3	vav guanine nucleotide exchange factor 3 [Source:HGNC Symbol;Acc:HGNC:12659]
VCAM1	vascular cell adhesion molecule 1 [Source:HGNC Symbol;Acc:HGNC:12663]
VEGFC	vascular endothelial growth factor C [Source:HGNC Symbol;Acc:HGNC:12682]
VEGFD	vascular endothelial growth factor D [Source:HGNC Symbol;Acc:HGNC:3708]
VIM	vimentin [Source:HGNC Symbol;Acc:HGNC:12692]
VNN1	vanin 1 [Source:HGNC Symbol;Acc:HGNC:12705]
VPS26B	VPS26, retromer complex component B [Source:HGNC Symbol;Acc:HGNC:28119]
VTCN1	V-set domain containing T cell activation inhibitor 1 [Source:HGNC Symbol;Acc:HGNC:28873]
WAS	WASP actin nucleation promoting factor [Source:HGNC Symbol;Acc:HGNC:12731]
WASF2	WASP family member 2 [Source:HGNC Symbol;Acc:HGNC:12733]
WASL	WASP like actin nucleation promoting factor [Source:HGNC Symbol;Acc:HGNC:12735]
WDFY4	WDFY family member 4 [Source:HGNC Symbol;Acc:HGNC:29323]
WDR1	WD repeat domain 1 [Source:HGNC Symbol;Acc:HGNC:12754]
WDR61	WD repeat domain 61 [Source:HGNC Symbol;Acc:HGNC:30300]
WDR7	WD repeat domain 7 [Source:HGNC Symbol;Acc:HGNC:13490]
WNK1	WNK lysine deficient protein kinase 1 [Source:HGNC Symbol;Acc:HGNC:14540]
WNT1	Wnt family member 1 [Source:HGNC Symbol;Acc:HGNC:12774]
WNT10B	Wnt family member 10B [Source:HGNC Symbol;Acc:HGNC:12775]
WNT2B	Wnt family member 2B [Source:HGNC Symbol;Acc:HGNC:12781]
WNT3A	Wnt family member 3A [Source:HGNC Symbol;Acc:HGNC:15983]
XRCC5	X-ray repair cross complementing 5 [Source:HGNC Symbol;Acc:HGNC:12833]
XRCC6	X-ray repair cross complementing 6 [Source:HGNC Symbol;Acc:HGNC:4055]
YTHDF2	YTH N6-methyladenosine RNA binding protein 2 [Source:HGNC Symbol;Acc:HGNC:31675]
YTHDF3	YTH N6-methyladenosine RNA binding protein 3 [Source:HGNC Symbol;Acc:HGNC:26465]
ZAP70	zeta chain of T cell receptor associated protein kinase 70 [Source:HGNC Symbol;Acc:HGNC:12858]
ZBTB1	zinc finger and BTB domain containing 1 [Source:HGNC Symbol;Acc:HGNC:20259]
ZBTB16	zinc finger and BTB domain containing 16 [Source:HGNC Symbol;Acc:HGNC:12930]
ZBTB24	zinc finger and BTB domain containing 24 [Source:HGNC Symbol;Acc:HGNC:21143]
ZBTB46	zinc finger and BTB domain containing 46 [Source:HGNC Symbol;Acc:HGNC:16094]
ZBTB7A	zinc finger and BTB domain containing 7A [Source:HGNC Symbol;Acc:HGNC:18078]
ZBTB7B	zinc finger and BTB domain containing 7B [Source:HGNC Symbol;Acc:HGNC:18668]
ZC3H12A	zinc finger CCCH-type containing 12A [Source:HGNC Symbol;Acc:HGNC:26259]
ZCCHC3	zinc finger CCHC-type containing 3 [Source:HGNC Symbol;Acc:HGNC:16230]
ZDHHC1	zinc finger DHHC-type containing 1 [Source:HGNC Symbol;Acc:HGNC:17916]
ZEB1	zinc finger E-box binding homeobox 1 [Source:HGNC Symbol;Acc:HGNC:11642]
ZFAT	zinc finger and AT-hook domain containing [Source:HGNC Symbol;Acc:HGNC:19899]
ZFP36	ZFP36 ring finger protein [Source:HGNC Symbol;Acc:HGNC:12862]
ZFP36L1	ZFP36 ring finger protein like 1 [Source:HGNC Symbol;Acc:HGNC:1107]
ZFP36L2	ZFP36 ring finger protein like 2 [Source:HGNC Symbol;Acc:HGNC:1108]
ZMIZ1	zinc finger MIZ-type containing 1 [Source:HGNC Symbol;Acc:HGNC:16493]
ZMPSTE24	zinc metallopeptidase STE24 [Source:HGNC Symbol;Acc:HGNC:12877]
ZNF335	zinc finger protein 335 [Source:HGNC Symbol;Acc:HGNC:15807]
ZNF580	zinc finger protein 580 [Source:HGNC Symbol;Acc:HGNC:29473]
ZNF784	zinc finger protein 784 [Source:HGNC Symbol;Acc:HGNC:33111]
ZPBP2	zona pellucida binding protein 2 [Source:HGNC Symbol;Acc:HGNC:20678]
